# A pedagogical walkthrough of computational modeling and simulation of Wnt signaling pathway using static causal models in Matlab<sup>‡</sup>

Shriprakash Sinha<sup>\*a</sup>

Received Xth XXXXXXXXXXXX 20XX, Accepted Xth XXXXXXXXXXXX 20XX

First published on the web Xth XXXXXXXXXXXX 200X

DOI: 10.1039/b000000x

## Insight, Innovation and Integration

Simulation study involving computational experiments dealing with Wnt signaling pathways abound in literature but often lack a pedagogical perspective that might ease the understanding of beginner students and researchers in transition who intend to work on modeling of the pathway. This paucity might happen due to restrictive policies which enforce an unwanted embargo on the sharing of important scientific knowledge. The manuscript elucidates embedding of prior biological knowledge, integration of heterogeneous information, transformation of biological hypothesis into computational framework and design of experiments in a simple manner interleaved with aspects of Bayesian Network toolbox and Matlab code so as to help readers get a feel of a project related to modeling of the pathway.

## Abstract

A tutorial introduction to computational modeling of Wnt signaling pathway in a human colorectal cancer dataset using static Bayesian network models is provided. This work endeavours to expound in detail the simulation study in Matlab along with the code while explaining the concepts related to Bayesian networks. This is done in order to ease the understanding of beginner students and researchers in transition to computational signaling biology, who intend to work in the field of modeling of signaling pathways. The case study is based on the contents of the advance article by Sinha<sup>1</sup> and takes the reader in a step by step process of how • the collection and the transformation of the available biological information from literature is done, • the integration of the heterogeneous data and prior biological knowledge in the network is achieved, • the simulation study is designed, • the hypothesis regarding a biological phenomena is transformed into computational framework, and • results and inferences drawn using *d*-connectivity/separability are reported. It is hoped that the walkthrough will aid biologists understand the design of the computational experiments using causal models. The manuscript finally ends with a programming assignment to help the readers get hands on experience of a perturbation project. Matlab code with dataset is made available under GNU GPL v3 license at google code project on <https://code.google.com/p/static-bn-for-wnt-signaling-pathway>

## 1 A journey of thousand miles begins with a single step

Simulation study involving computational experiments dealing with signaling pathways abound in literature but often lack a pedagogical perspective that might ease the understanding of beginning students and researchers in transition who intend to work on computational modeling of the pathways. Often, it is

hard for beginners to comprehend a starting point of a project and the amount of time spent is immense before a project takes shape. This manuscript makes use of a synergistic approach to elucidate various concepts in a simple manner along with the exposition of design of experiments as well as the code so as to help beginners get a feel of a project related to computational modeling of a signaling pathway. Programming along with the exposition in the manuscript could clear up issues faced during the execution of the project.

This manuscript uses the contents of the advance article Sinha<sup>1</sup> as a basis to explain the workflow of a computational simulation project involving Wnt signaling pathway in human colorectal cancer. The aim of the article was to computationally test whether the activation of  $\beta$ -catenin and *TCF4* based transcription complex always corresponds to the tumorous state of the test sample or not. To achieve this the gene

<sup>‡</sup> This manuscript is a part of the Netherlands Bioinformatics Centre (NBIC) BioRange-II project BR2.5 (code - IGD71G). It complements and uses material from Sinha<sup>1</sup>. Netherlands Bioinformatics Centre was supported by the Netherlands Genomics Initiative (NGI) via the Netherlands Genomics Institute in The Netherlands.

<sup>a</sup> Independent Researcher, 104-Madhurisha Heights Phase 1, Risali Sector, Bhilai - 490006, C.G., India

\* Shriprakash Sinha wrote this manuscript while working as an Independent Researcher in India. E-mail: [shriprakash.sinha@gmail.com](mailto:shriprakash.sinha@gmail.com)

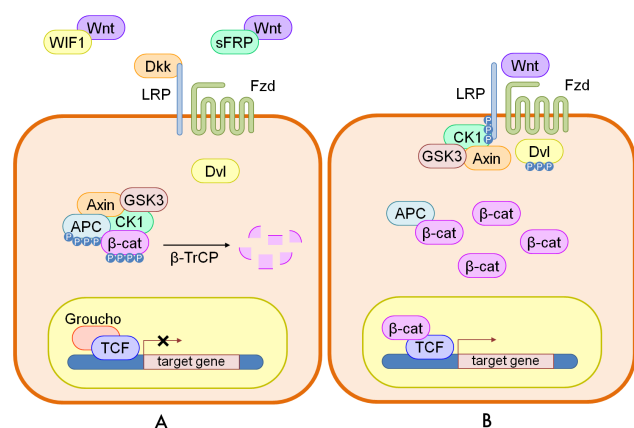

**Fig. 1** A cartoon of wnt signaling pathway contributed by Verhaegh *et al.*<sup>2</sup>. Part (A) represents the destruction of  $\beta$ -catenin leading to the inactivation of the wnt target gene. Part (B) represents activation of wnt target gene.

expression data provided by Jiang *et al.*<sup>3</sup> was used in the computational experiments. Further, to refine the model, prior biological knowledge related to the intra/extracellular factors of the pathway (available in literature) was integrated along with epigenetic information.

Theory and programming code will be explained in an interleaved manner to help the readers get a feel of the project as well as come get an insight into the hurdles faced will executing such a project. Material from Sinha<sup>1</sup> will be presented in grey colored boxes and used to explain the various aspects of the Matlab code presented here. Code will be presented in typewriter font and functions in the text will be presented in sans serif.

## 2 Modeling and simulation

### 2.1 Data collection and estimation

An important component of this project is the Bayesian Network Toolbox provided by Murphy *et al.*<sup>15</sup> and made freely available for download on <https://code.google.com/p/bnt/> as well as a Matlab license. Instructions for installations are provided on the website. One can make a directory titled *temp* with a subdirectory named *data* and transfer the *geneExpression.mat* file into *data*.

```
>> mkdir temp
>> cd temp
>> mkdir data
>>
```

The *.mat* file contains expression profiles from Jiang *et al.*<sup>3</sup> for genes that play a role in Wnt signaling pathway at an in-

**Canonical Wnt signaling pathway** The canonical Wnt signaling pathway is a transduction mechanism that contributes to embryo development and controls homeostatic self-renewal in several tissues (Clevers<sup>4</sup>). Somatic mutations in the pathway are known to be associated with cancer in different parts of the human body. Prominent among them is the colorectal cancer case (Gregorieff and Clevers<sup>5</sup>). In a succinct overview, the Wnt signaling pathway works when the Wnt ligand gets attached to the Frizzled (*fzd*)/*LRP* coreceptor complex. *Fzd* may interact with the Dishevelled (*Dvl*) causing phosphorylation. It is also thought that Wnts cause phosphorylation of the *LRP* via casein kinase 1 (*CK1*) and kinase *GSK3*. These developments further lead to attraction of Axin which causes inhibition of the formation of the degradation complex. The degradation complex constitutes of Axin, the  $\beta$ -catenin transportation complex *APC*, *CK1* and *GSK3*. When the pathway is active the dissolution of the degradation complex leads to stabilization in the concentration of  $\beta$ -catenin in the cytoplasm. As  $\beta$ -catenin enters into the nucleus it displaces the *Groucho* and binds with transcription cell factor *TCF* thus instigating transcription of Wnt target genes. *Groucho* acts as lock on *TCF* and prevents the transcription of target genes which may induce cancer. In cases when the Wnt ligands are not captured by the coreceptor at the cell membrane, Axin helps in formation of the degradation complex. The degradation complex phosphorylates  $\beta$ -catenin which is then recognized by *Fbx/WD* repeat protein  $\beta$ -*TrCP*.  $\beta$ -*TrCP* is a component of ubiquitin ligase complex that helps in ubiquitination of  $\beta$ -catenin thus marking it for degradation via the proteasome. Cartoons depicting the phenomena of Wnt activation are shown in figures 1(A) and 1(B), respectively.

**Table 1** Canonical Wnt Pathway from Sinha<sup>1</sup>

tra/extracellular level and are known to have inhibitory affect on the Wnt pathway due to epigenetic factors. For each of the 24 normal mucosa and 24 human colorectal tumor cases, gene expression values were recorded for 14 genes belonging to the family of *SFRP*, *DKK*, *WIF1* and *DACT*. Also, expression values of established Wnt pathway target genes like *LEF1*, *MYC*, *CD44* and *CCND1* were recorded per sample.

The directory *temp* also contains some of the *.m* files, parts of contents of which will be explained in the order of execution of the project. The main code begins with a script titled *twoHoldOutExp.m*. This script contains the function *twoHoldOutExp* which takes two arguments named *evidence* and *model*. *evidence* implies the evidence regarding 'ge' for gene evidence, 'me' for methylation, 'ge+me' for both gene and methylation, while *model* implies the net-

**Epigenetic Factors** One of the widely studied epigenetic factors is methylation (Costello and Plass<sup>6</sup>, Das and Singal<sup>7</sup>, Issa<sup>8</sup>). Its occurrence leads to decrease in the gene expression which affects the working of Wnt signaling pathways. Such characteristic trends of gene silencing like that of secreted frizzled-related proteins (*SFRP*) family in nearly all human colorectal tumor samples have been found at extracellular level (Suzuki *et al.*<sup>9</sup>). Similarly, methylation of genes in the Dickkopf (*DKKx* Niehrs<sup>10</sup>, Sato *et al.*<sup>11</sup>), Dapper antagonist of catenin (*DACTx* Jiang *et al.*<sup>3</sup>) and Wnt inhibitory factor-1 (*WIF1* Taniguchi *et al.*<sup>12</sup>) family are known to have significant effect on the Wnt pathway. Also, histone modifications (a class of proteins that help in the formation of chromatin which packs the DNA in a special form Strahl and Allis<sup>13</sup>) can affect gene expression (Peterson *et al.*<sup>14</sup>). In the context of the Wnt signaling pathway it has been found that *DACT* gene family show a peculiar behavior in colorectal cancer (Jiang *et al.*<sup>3</sup>). *DACT1* and *DACT2* showed repression in tumor samples due to increased methylation while *DACT3* did not show obvious changes to the interventions. It is indicated that *DACT3* promoter is simultaneously modified by the both repressive and activating (bivalent) histone modifications (Jiang *et al.*<sup>3</sup>).

**Table 2** Epigenetic Factors from Sinha<sup>1</sup>

work model that will be used for simulation. Sinha<sup>1</sup> uses three different models i.e 't1' or  $\mathcal{M}_{PBK+EI}$  that contains prior biological knowledge as well as epigenetic information, 't2' or  $\mathcal{M}_{PBK}$  that contains only prior biological knowledge and finally, 'p1' or  $\mathcal{M}_{NB+MPBK}$  that is a modified version of naive bayes framework from Verhaegh *et al.*<sup>2</sup>. In Matlab, one can type the following

```
>> twoHoldOutExp("ge", "t1")
```

The code begins with the extraction of data from the gene expression matrix by reading the *geneExpression.mat* file via the function *readCustomFile* in the *readCustomFile.m* and generates the following variables as the output - (1) *uniqueGenes* - name of genes gleaned from the file, (2) *expressionMatrix* - 2D matrix containing the gene expression per sample data (3) *noGenes* - total number of genes available (4) *noSamples* - total number of samples available (5) *groundTruthLabels* - original labels available from the files (6) *transGroundTruthLabels* - labels transformed into numerals.

```
% Data Collection
%====
% Extract data from the gene expression
% matrix
[uniqueGenes, expressionMatrix,...
```

```
noGenes, noSamples, groundTruthLabels, ...
transGroundTruthLabels] = ...
readCustomFile('data/geneExpression.mat');
```

## 2.2 Assumed and estimated probabilities from literature

Next, the probability values for some of the nodes in the network is loaded, depending on the type of the network. Why these assumed and estimated probabilities have been addressed in the beginning of the computation experiment will be explained later. Meanwhile, the estimation of probabilities is achieved through the function called *dataStorage* in the *dataStorage.m*. The function takes the name of the *model* as an input argument and returns the name of the file called *probabilities.mat* in the variable *filename*. The mat file contains all the assumed and computed probabilities of nodes for which data is available and is loaded into the workspace of the Matlab for further use.

```
% Load probability values for some of
% the nodes in the network
fname = dataStorage(model);
load(fname);
```

$\mathcal{M}_{PBK+EI}$  (model='t1') requires more estimations that  $\mathcal{M}_{PBK}$  (model='t2') and  $\mathcal{M}_{NB}$  (model=p1) due to use of epigenetic information. Depending on the type of model parameter fed to the function *dataStorage* the probabilities for the following factors are estimated

1. Repressive Histone Mark *H3K27me3* for *DACT3* 11 Loci from Jiang *et al.*<sup>3</sup> were adopted. Via fold enrichment, the affects of the *H3K27me3* was found 500 bp downstream of and near the *DACT3* transcription start site (TSS) in HT29 cells. These marks were recorded via chromatin immuno-precipitation (ChIP) assays and enriched at 11 different loci in the 3.5 kb to 3.5 kb region of the *DACT3* TSS. Fold enrichment measurements of *H3K27me3* for normal *FHs74Int* and cancerous *SW480* were recorded and normalized. The final probabilities are the average of the normalized values.
2. Active Histone Mark *H3K4me3* for *DACT3* Loci from Jiang *et al.*<sup>3</sup> were adopted. Via fold enrichment, the affects of the *H3Kme3* was found 500 bp downstream of and near the *DACT3* transcription start site (TSS) in HT29 cells. These marks were recorded via chromatin immuno-precipitation (ChIP) assays and enriched at 11 different loci in the 3.5 kb to 3.5 kb region of the *DACT3* TSS. Fold enrichment measurements of *H3K4me3* for normal *FHs74Int* and cancerous *SW480* were recorded and normalized. The final probabilities are the average of the normalized values.

- Fractions for methylation of *DKK1* and *WIF1* gene taken from Aguilera *et al.*<sup>16</sup> via manual counting through visual inspection of intensity levels from methylation specific PCR (MSP) analysis of gene promoter region and later normalized
- Fractions for methylation and non-methylation status of *SFRP1*, *SFRP2*, *SFRP4* and *SFRP5* (CpG islands around the first exons) was recorded from 6 affected individuals each having both primary CRC tissues and normal colon mucosa from Suzuki *et al.*<sup>17</sup> via manual counting through visual inspection of intensity levels from methylation specific PCR (MSP) analysis of gene promoter region and later normalized.
- Methylation of *DACT1* (+52 to +375 BGS) and *DACT2* (+52 to +375 BGS) in promoter region for *Normal*, *HT29* and *RKO* cell lines from Jiang *et al.*<sup>3</sup> was recorded via counting through visual inspection of open or closed circles indicating methylation status estimated from bisulfite sequencing analysis and later normalized.
- Concentration of *DVL2* decreases with expression of *DACT3* and vice versa Jiang *et al.*<sup>3</sup>. Due to lack of exact proportions the probability values were assumed.
- Concentration of  $\beta$ -catenin given concentrations of *DVL2* and *DACT1* varies and for static model it is tough to assign probability values. High *DVL2* concentration or suppression (expression) of *DACT1* leads to increase in concentration of  $\beta$ -catenin (<sup>3</sup>, Yuan *et al.*<sup>18</sup>). Wet lab experimental evaluations might reveal the factual proportions.
- Similarly, the concentrations of *TRCMPLX* (Clevers<sup>4</sup>, Kriegl *et al.*<sup>19</sup>) and *TCF4* (Verhaegh *et al.*<sup>2</sup>) have been assumed based on their known roles in the Wnt pathway. Actual proportions require further wet lab tests.
- Finally, the probability of *Sample* being tumorous or normal is a chance level as it contains equal amount of cancerous and normal cases.

Note that all these probabilities have been recorded in table 1 of Sinha<sup>1</sup> and their values stored in the *probabilities.mat* file. Addressing the question of why these probabilities have been estimated earlier, it can be seen that the extra/intracellular factors affecting the Wnt pathway in the data set provided by Jiang *et al.*<sup>3</sup> contains some genes whose expression is influenced by epigenetic factors mentioned in table 2. Hence it is important to tabulate and store prior probability values for known biological factors that influence the pathway. Also, the probability values of these nodes have been computed earlier due to prior available information. Once estimated or assumed

based on biological knowledge, these probabilities needed not be recomputed and are thus stored in proper format at the beginning of the computational experiment.

### 2.3 Building the bayesian network model

Next comes the topology of the network using prior biological knowledge made available from results of wet lab experiments documented in literature. This is achieved using the function `generateInteraction` in the file `generateInteraction.m`. The function takes in the set of `uniqueGenes` and the type of `model` and generates a cell of `interaction` for the Bayesian network as well as a cell of `unique` set of `Nodenames`. `interaction` contains all the prior established biological knowledge that carries causal semantics in the form of arcs between parent and child nodes. It should be noted that even though the model is not complete due to its static nature, it has the ability to encode prior causal relationships and has the potential for further refinement.

```
% Building the Bayesian Network model
%=====
% Generate directionality between
% parent and child nodes
[interaction, nodeNames] = ...
    generateInteraction(uniqueGenes,...
        model);
```

The `interaction` and `nodeNames` go as input arguments to the function `mk_adj_mat`, which generates an adjacency matrix for a directed acyclic graph (DAG) stored in `dag`. Using functions `biograph` and input arguments `dag` and `nodeNames` generates a structure `gObj` that can be used to view the topology of the network. A crude representation of  $\mathcal{M}_{PBK+EI}$  and  $\mathcal{M}_{NB+MPBK}$  shown in figures 2 and 3 was generated using the function `view`.

```
% Generate dag for the interaction
% between nodeNames
dag = mk_adj_mat(interaction,...
    nodeNames, 0);

% To visualise the graphs or bayesian
% network
gObj = biograph(dag,nodeNames)
gObj = view(gObj);
```

Once the adjacency matrix is ready, the initialization of the Bayesian Network can be easily done. The total number of nodes is stored in `N` and the size of the nodes are defined in `nodeSizes`. In this project each node has a size of two as they contain discrete values representing binary states. Here the function `ones` defines a row vector with `N` columns. Thus each node is set to a size of 2. The total number of discrete



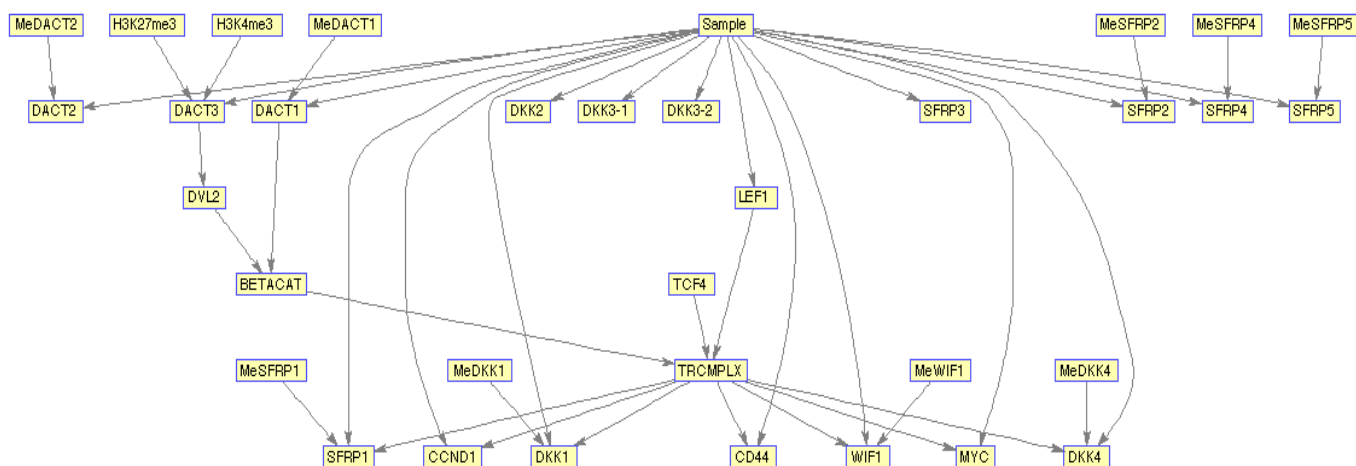

**Fig. 2** Influence diagram of  $\mathcal{M}_{PBK+EI}$  contains partial prior biological knowledge and epigenetic information in the form of methylation and histone modification. In this model the state of Sample is distinguished from state of *TRCMPLX* that constitutes the Wnt pathway.

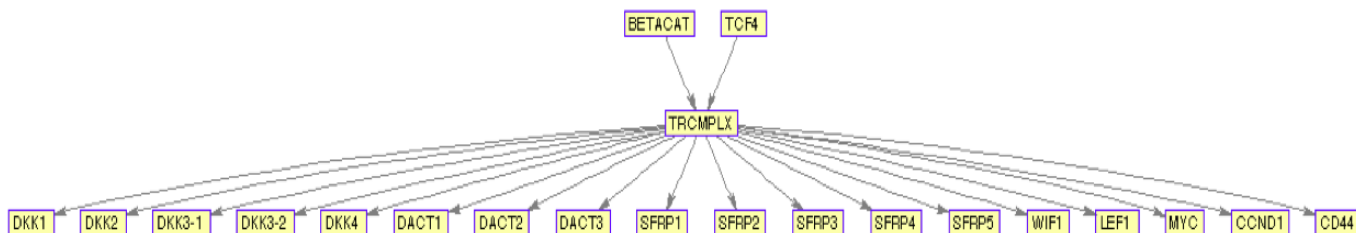

**Fig. 3** Influence diagram of  $\mathcal{M}_{NB+MPBK}$  is a Naive Bayes model that contains minimal prior biological knowledge. In this model the state of *TRCMPLX* is assumed to indicate whether the sample is cancerous or not.

nodes is defined in `discreteNodes`. Finally, the Bayesian Network is created using the function `mk_bnet` from the BNT that takes the following as input arguments (1) `dag` - the adjacency matrix (2) `nodeSizes` - defines the size of the nodes and (3) `discreteNodes` - the vector of nodes with their indices marked to be discrete in the Bayesian Network and dumps the network in the variable `bnet`.

```
% BN initialization
N = length(nodeNames); % # of nodes

% Define node sizes. NOTE - nodes are
% assumed to contain discrete values
nodeSizes = 2*ones(1, N);

% Discrete nodes
discreteNodes = 1:N;
```

```
% Create BN
bnet = mk_bnet(dag, nodeSizes, ...
'names', nodeNames, 'discrete', ...
discreteNodes);
```

Section 4 of Sinha<sup>1</sup> has been reproduced for completeness in tables 3, 4, 5, 6 and 7.

## 2.4 Hold out experiment

After the framework of the Bayesian Network has been constructed and initialized, the hold out experiment is conducted. The purpose of conducting the experiment is to generate results on different test data while training the Bayesian Network with different sets of training data, a multiple number of time. From Sinha<sup>1</sup>, the design of the experiment is a sim-

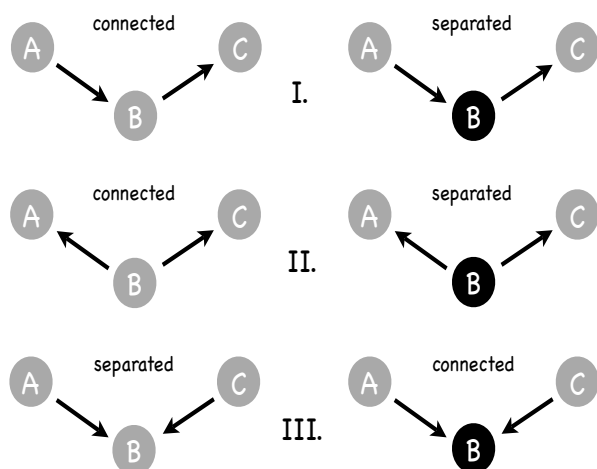

**Fig. 4** Cases for d-connectivity and d-separation. Black (Gray) circles mean evidence is available (not available) regarding a particular node.

**Bayesian Wnt pathway** Three static models have been developed based on particular gene set measured for human colorectal cancer cases (Jiang *et al.*<sup>3</sup>). Available epigenetic data for individual gene is also recorded. For sake of simplicity the models are connoted as  $\mathcal{M}_{PBK+EI}$  (model with Prior Biological Knowledge (PBK) and Epigenetic Information (EI)),  $\mathcal{M}_{PBK}$  (model with PBK only) and  $\mathcal{M}_{NB+MPBK}$  (model with Naive Bayes (NB) formulation and Minimal PBK). All models are simple directed acyclic graphs (DAG) with nodes and edges. Figure 2 shows a detailed influence diagram of  $\mathcal{M}_{PBK+EI}$  between the nodes and the edges. The nodes specify status of genes expression (*DKK1*, *DKK2*, *DKK3-1*, *DKK3-2*, *DKK4*, *DACT1*, *DACT2*, *DACT3*, *SFRP1*, *SFRP2*, *SFRP3*, *SFRP4*, *SFRP5*, *WIF1*, *MYC*, *CD44*, *CCND1* and *LEF1*), methylation (*MeDACT1*, *MeDACT2*, *MeSFRP1*, *MeSFRP2*, *MeSFRP4*, *MeSFRP5*, *MeDKK1*, *MeDKK4* and *MeWIF1*), histone marks for *DACT3* (*H3K27me3* and *H3K4me3*), transcription complex *TRCMPLX*, samples *Sample* and factors involved in formation of *TRCMPLX* like  *$\beta$ -catenin*, *TCF4* and *LEF1*. Note that there were two recordings of gene expression *DKK3* and thus were distinguished by *DKK3-1* and *DKK3-2*. Some causal relations are based on prior biological knowledge and others are based on assumptions, elucidation of which follows in the next section.

**Table 3** Bayesian Wnt pathway from Sinha<sup>1</sup>

**Network With PBK And EI** The NB model (Verhaegh *et al.*<sup>2</sup>) assumes that the activation (inactivation) of  *$\beta$ -catenin* based transcription complex is equivalent to the fact that the sample is cancerous (normal). This assumption needs to be tested and in this research work the two newly improvised models based on prior biological knowledge regarding the signaling pathway assume that sample prediction may not always mean that the  *$\beta$ -catenin* based transcription complex is activated. These assumptions are incorporated by inserting another node of *Sample* for which gene expression measurements were available. This is separate from the *TRCMPLX* node that influences a particular set of known genes in the human colorectal cancer. For those genes whose relation with the *TRCMPLX* is currently not known or biologically affirmed, indirect paths through the *Sample* node to the *TRCMPLX* exist, technical aspect of which will be described shortly. Since all gene expressions have been measured from a sample of subjects the expression of genes is conditional on the state of the *Sample*. Here both tumorous and normal cases are present in equal amounts. The transcription factor *TRCMPLX* under investigation is known to operate with the help of interaction between  *$\beta$ -catenin* with *TCF4* and *LEF1* (Waterman<sup>20</sup>, Kriegl *et al.*<sup>19</sup>). It is also known that the regions in the TSS of *MYC* (Yochum<sup>21</sup>), *CCND1* (Schmidt-Ott *et al.*<sup>22</sup>), *CD44* (Kanwar *et al.*<sup>23</sup>), *SFRP1* (Caldwell *et al.*<sup>24</sup>), *WIF1* (Reguart *et al.*<sup>25</sup>), *DKK1* (González-Sancho *et al.*<sup>26</sup>) and *DKK4* (Pendas-Franco *et al.*<sup>27</sup>, Baehs *et al.*<sup>28</sup>) contain factors that have affinity to  *$\beta$ -catenin* based *TRCMPLX*. Thus expression of these genes are shown to be influenced by *TRCMPLX*, in figure 2. Roles of *DKK2* (Matsui *et al.*<sup>29</sup>) and *DKK3* (Zitt *et al.*<sup>30</sup>, Veeck and Dahl<sup>31</sup>) have been observed in colorectal cancer but their transcriptional relation with  *$\beta$ -catenin* based *TRCMPLX* is not known. Similarly, *SFRP2* is known to be a target of *Pax2* transcription factor and yet it affects the  *$\beta$ -catenin* Wnt signaling pathway (Brophy *et al.*<sup>32</sup>). Similarly, *SFRP4* (Feng Han *et al.*<sup>33</sup>, Huang *et al.*<sup>34</sup>) and *SFRP5* (Suzuki *et al.*<sup>9</sup>) are known to have affect on the Wnt pathway but their role with *TRCMPLX* is not well studied. *SFRP3* is known to have a different structure and function with respect to the remaining *SFRPx* gene family (Hoang *et al.*<sup>35</sup>). Also, the role of *DACT2* is found to be conflicting in the Wnt pathway (Kivimäe *et al.*<sup>36</sup>). Thus for all these genes whose expression mostly have an extracellular affect on the pathway and information regarding their influence on  *$\beta$ -catenin* based *TRCMPLX* node is not available, an indirect connection has been made through the *Sample* node. This connection will be explained at the end of this section.

**Table 4** Network with PBK+EI from Sinha<sup>1</sup>

**Network With PBK And EI continued ...** Lastly, it is known that concentration of *DVL2* (a member of Disheveled family) is inversely regulated by the expression of *DACT3* (Jiang *et al.*<sup>3</sup>). High *DVL2* concentration and suppression of *DACT1* leads to increase in stabilization of  $\beta$ -catenin which is necessary for the Wnt pathway to be active (Jiang *et al.*<sup>3</sup>). But in a recent development (Yuan *et al.*<sup>18</sup>) it has been found that expression of *DACT1* positively regulates  $\beta$ -catenin. Both scenarios need to be checked via inspection of the estimated probability values for  $\beta$ -catenin using the test data. Thus there exists direct causal relations between parent nodes *DACT1* and *DVL2* and child node,  $\beta$ -catenin. Influence of methylation (yellow hexagonal) nodes to their respective gene (green circular) nodes represent the affect of methylation on genes. Influence of histone modifications in *H3K27me3* and *H3K4me3* (blue octagonal) nodes to *DACT3* gene node represents the affect of histone modification on *DACT3*. The  $\beta$ -catenin (blue square) node is influenced by concentration of *DVL2* (depending on the expression state of *DACT3*) and behavior of *DACT1*. The aforementioned established prior causal biological knowledge is imposed in the BN model with the aim to computationally reveal unknown biological relationships. The influence diagram of this model is shown in figure 2 with nodes on methylation and histone modification. Another model  $M_{PBK}$  (not shown here) was developed excluding the epigenetic information (i.e removal of nodes depicting methylation and histone modification as well as the influence arcs emerging from them) with the aim to check whether inclusion of epigenetic factors increases the cancer prediction accuracy. In order to understand indirect connections further it is imperative to know about **d-connectivity/separability**. In a BN model this connection is established via the principle of **d-connectivity** which states that nodes are *connected* in a path when there exists no node in the path that has more than one incoming influence edge or there exists nodes in path with more than one incoming influence edge which are observed (i.e evidence regarding such nodes is available) (Charniak<sup>37</sup>). Conversely, via principle of **d-separation** nodes are *separated* in a path when there exists nodes in the path that have more than one incoming influence edge or there exists nodes in the path with at most one incoming influence edge which are observed (i.e evidence regarding such nodes is available). Figure 4 represents three different cases of connectivity and separation between nodes *A* and *C* when the path between them passes through node *B*. Connectivity or dependency exists between nodes *A* and *C* when • evidence is not present regarding node *B* in the left graphs of I. and II. in figure 4 or • evidence is present regarding node *B* in the right graph of III. in figure 4.

**Table 5** Network with PBK+EI continued from Sinha<sup>1</sup>

**Network With PBK And EI continued ...** Conversely, separation or independence exists between nodes *A* and *C* when • evidence is present regarding node *B* in the right graphs of I. and II. in figure 4 or • evidence is not present regarding node *B* in the left graph of III. in figure 4. It would be interesting to know about the behaviour of *TRCMPLX* given the evidence of state of *SFRP3*. To reveal such information paths must exist between these nodes. It can be seen that there are multiple paths between *TRCMPLX* and *SFRP2* in the BN model in figure 2. These paths are enumerated as follows:

1. *SFRP3*, *Sample*, *SFRP1*, *TRCMPLX*
2. *SFRP3*, *Sample*, *DKK1*, *TRCMPLX*
3. *SFRP3*, *Sample*, *WIF1*, *TRCMPLX*
4. *SFRP3*, *Sample*, *CD44*, *TRCMPLX*
5. *SFRP3*, *Sample*, *DKK4*, *TRCMPLX*
6. *SFRP3*, *Sample*, *CCND1*, *TRCMPLX*
7. *SFRP3*, *Sample*, *MYC*, *TRCMPLX*
8. *SFRP3*, *Sample*, *LEF1*, *TRCMPLX*
9. *SFRP3*, *Sample*, *DACT3*, *DVL2*,  $\beta$ -catenin, *TRCMPLX*
10. *SFRP3*, *Sample*, *DACT1*,  $\beta$ -catenin, *TRCMPLX*

Knowledge of evidence regarding nodes of *SFRP1* (path 1), *DKK1* (path 2), *WIF1* (path 3), *CD44* (path 4), *DKK4* (path 5), *CCND1* (path 6) and *MYC* (path 7) makes *Sample* and *TRCMPLX* dependent or d-connected. Further, no evidence regarding state of *Sample* on these paths instigates dependency or connectivity between *SFRP3* and *TRCMPLX*. On the contrary, evidence regarding *LEF1*, *DACT3* and *DACT1* makes *Sample* (and child nodes influenced by *Sample*) independent or d-separated from *TRCMPLX* through paths (8) to (10). Due to the dependency in paths (1) to (7) and the given state of *SFRP3* (i.e evidence regarding it being active or passive), the BN uses these paths during inference to find how *TRCMPLX* might behave in normal and tumorous test cases. Thus, exploiting the properties of d-connectivity/separability, imposing a biological structure via simple yet important prior causal knowledge and incorporating epigenetic information, BN help in inferring many of the unknown relation of a certain gene expression and a transcription complex.

**Table 6** Network with PBK+EI continued from Sinha<sup>1</sup>

**Network With Minimal PBK** Lastly, a Naive Bayes model  $M_{NB+MPBK}$  with minimal biological knowledge based on Verhaegh *et al.*<sup>2</sup> model was also developed with an aim to check if the assumed hypothesis that activation state of *TRCMPLX* is same as sample being cancerous is correct. In this model all gene expressions are assumed to be transcribed via the  $\beta$ -catenin based *TRCMPLX* and thus causal arcs exist from *TRCMPLX* to different gene nodes. The complex itself is influenced by  $\beta$ -catenin and *TCF4* only. Such models can be used for prediction purpose but are not useful in revealing hidden biological relationships as no or minimal prior biological information is imposed on the Naive Bayes model. Figure 3 shows the Naive Bayes model.

**Table 7** Network with NB+MPBK from Sinha<sup>1</sup>

ple 2-holdout experiment where one sample from the normal and one sample from the tumorous are paired to form a test dataset. Excluding the pair formed in an iteration of 2-hold out experiment the remaining samples are considered for training of a BN model. Thus in a data set of 24 normal and 24 tumorous cases, a training set will contain 46 samples and a test set will contain 2 samples (one of normal and one of tumor). This procedure is repeated for every normal sample which is combined with each of the tumorous sample to form a series of test dataset. In total there will be 576 pairs of test data and 576 instances of training data. Note that for each test sample in a pair, the expression value for a gene is discretized using threshold computed for that particular gene from the training set. Computation of threshold will be elucidated later. This computation is repeated for all genes per test sample. Based on the available evidences from the state of expression of all genes, that constitute the test data, inference regarding the state of the both  $\beta$ -catenin transcription complex and the test sample is made. These inferences reveal

- hidden biological relationship between the expressions of the set of genes under consideration and the  $\beta$ -catenin transcription complex and
- information regarding the activation state of the  $\beta$ -catenin transcription complex and the state of the test sample, as a penultimate step to the proposed hypothesis testing. Two sample Kolmogorov-Smirnov (KS) test was employed to measure the statistical significance of the distribution of predictions of the states of the previously mentioned two factors.

Apart from testing the statistical significance between the states of factors, it was found that the prediction results for the factors, obtained from models including and excluding epigenetic information, were also significantly different. The receiver operator curve (ROC) graphs and their respective area under the curve (AUC) values indicate how the predictions on the test data behaved under different models. Ideally, high val-

ues of AUC and steepness in ROC curve indicate good quality results.

The hold out experiment begins with the computation of the total number of positive and negative labels present in the whole data set as well as the search of the indices of the labels. For this the values in the variable `noSamples` and `transGroundTruthLabels` computed from function `readCustomFile` is used. `noPos` (`noNeg`) and `posLabelIdx` (`negLabelIdx`) store the number of positive (negative) labels and their indices, respectively.

```
% Hold out experiment
%====
% Compute no. of positive and negative
% labels and find indices of both
noPos = 0;
posLabelIdx = [];
noNeg = 0;
negLabelIdx = [];
for i = 1:noSamples
    if transGroundTruthLabels(i) > 0
        noPos = noPos + 1;
        posLabelIdx = [posLabelIdx, i];
    else
        noNeg = noNeg + 1;
        negLabelIdx = [negLabelIdx, i];
    end
end
```

For storing results as well as the number of times the experiment will run, variables `runCnt` and `Runs` are initialized. The condition in the `if` statement is not useful now and will be described later.

```
runCnt = 0;
Runs = struct([]);
if ~isempty(strfind(evidence, 'me'))
    RunsOnObservedMethylation = ...
        struct([]);
end
```

For each and every positive (cancerous) and negative (normal) labels, the number of times the experiments runs is incremented in the count variable `runCnt`. Next the indices for test data is separated by using the  $i^{th}$  positive and the  $j^{th}$  negative label and its indices is stored in `testDataIdx`. The test data itself is then separated from `expressionMatrix` using the `testDataIdx` and stored in `dataForTesting`. The corresponding ground truth labels of the test data are extracted from `transGroundTruthLabels` using `testDataIdx` and stored in `labelForTesting`.

```
for i = 1:noPos
    for j = 1:noNeg
```



```
% Count for number of runs
runCnt = runCnt + 1;

% Build test dataset (only 2
% examples per test set)
testDataIdx = [negLabelIdx(j), ...
               posLabelIdx(i)];
dataForTesting = expressionMatrix(:, ...
                                   testDataIdx);
labelForTesting = ...
transGroundTruthLabels(:, ...
                        testDataIdx);
```

After the storage of the test data and its respective indices, `trainingDataIdx` is used to store the indices of training data by eliminating the indices of the test data. This is done using temporary variables `tmpPosLabelIdx` and `tmpNegLabelIdx`. `trainingDataIdx` is used to store the training data in variable `dataForTraining` using `expressionMatrix` and the indices of training data in variable `labelForTraining` using `transGroundTruthLabels`.

```
% Remove test dataset from the whole
% dataset and build train dataset
tmpPosLabelIdx = posLabelIdx;
tmpNegLabelIdx = negLabelIdx;
tmpPosLabelIdx(i) = [];
tmpNegLabelIdx(j) = [];
trainDataIdx = [tmpNegLabelIdx, ...
                tmpPosLabelIdx];
dataForTraining = ...
expressionMatrix(:, trainDataIdx);
labelForTraining = ...
transGroundTruthLabels(:, ...
                        trainDataIdx);
```

**2.4.1 Defining and estimating probabilities and conditional probabilities tables for nodes in `bnet`:** Till now, the probabilities as well as conditional probability tables (cpt) for some of the nodes have been stored in the `probabilities.mat` file and loaded in the workspace. But the cpt for all the nodes in the `bnet` remain uninitialized. The next procedure is to initialize the tables using assumed values for some of the known nodes while estimating the entries of cpt for other nodes using training data.

To this end it is important to define a variable by the name `cpdStorage` of the format structure. Starting with all the nodes that have no parents and whose probabilities and cpt have been loaded in the workspace (saved in `probabilities.mat`), the `for` loop iterates through all the nodes in the network defined by `N`, stores the index of the  $k^{th}$  node in `nodeidx` using function `bnet.names`

with input argument `nodeNames{k}` and assigns values to cpt depending on the type of model. If  $\mathcal{M}_{PBK+EI}$  (model='t1') is used and the  $k^{th}$  entry in `nodeNames` matches with `TCF4` then the cpt value in `PrTCF4` is assigned to cpt. The parent node of this node is assigned a value 0 and stored in `cpdStorage(k).parentnode{1}`. The name `TCF4` or `nodeNames{k}` is assigned to `cpdStorage(k).node`. The cpt values in cpt is assigned to `cpdStorage(k).cpt`. Finally, the conditional probability density cpt for the node with name `TCF4` is stored in `bnet.CPD` using function `tabular_CPD`, the Bayesian Network `bnet`, the node index `nodeidx` and cpt. Similarly, values in `PrMeDKK1`, `avgPrMeDACT1`, `avgPrMeDACT2`, `avgPrH3K27me3`, `avgPrH3K4me3`, `PrMeSFRP1`, `PrMeSFRP2`, `PrMeSFRP4`, `PrMeSFRP5`, `PrMeWIF1` and `PrSample` initialize the cpt values for nodes `MeDACT1`, `MeDACT2`, `H3k27me3`, `H3k4me3`, `MeSFRP1`, `MeSFRP2`, `MeSFRP4`, `MeSFRP5`, `MeWIF1` and `Sample`, respectively.

Similar initializations happen for models  $\mathcal{M}_{PBK}$  (model='t2') and  $\mathcal{M}_{NB+MPBK}$  (model='p1'). It should be noted that in  $\mathcal{M}_{PBK}$  ( $\mathcal{M}_{NB+MPBK}$ ) the only nodes without parents are `TCF4` and `Sample` (`TCF4` and `BETACAT`). To accommodate for these models, the necessary `elseif` statements have been embedded in the `for` loop below.

```
% Define P and CPD for the nodes of the
% bnet
cpdStorage = struct([]);
% Store probabilities for nodes with no
% parents
for k = 1:N
nodeidx = bnet.names(nodeNames{k});
if isempty(bnet.parents{nodeidx})
% tables for non-gene measurements
if ~isempty(strfind(model,'t1'))
if strcmp(nodeNames{k}, 'TCF4')
cpt = PrTCF4;
elseif strcmp(nodeNames{k}, ...
               'MeDKK1')
cpt = PrMeDKK1;
elseif strcmp(nodeNames{k}, ...
               'MeDACT1')
cpt = avgPrMeDACT1;
elseif strcmp(nodeNames{k}, ...
               'MeDACT2')
cpt = avgPrMeDACT2;
elseif strcmp(nodeNames{k}, ...
               'H3k27me3')
cpt = avgPrH3K27me3;
elseif strcmp(nodeNames{k}, ...
               'H3k4me3')
```

```
cpt = avgPrH3K4me3;
elseif strcmp(nodeNames{k}, ...
    'MeSFRP1')
    cpt = PrMeSFRP1;
elseif strcmp(nodeNames{k}, ...
    'MeSFRP2')
    cpt = PrMeSFRP2;
elseif strcmp(nodeNames{k}, ...
    'MeSFRP4')
    cpt = PrMeSFRP4;
elseif strcmp(nodeNames{k}, ...
    'MeSFRP5')
    cpt = PrMeSFRP5;
elseif strcmp(nodeNames{k}, ...
    'MeWIF1')
    cpt = PrMeWIF1;
elseif strcmp(nodeNames{k}, ...
    'Sample')
    cpt = PrSample;
end
elseif ~isempty(strfind(model, ...
    't2'))
    if strcmp(nodeNames{k}, 'TCF4')
        cpt = PrTCF4;
    elseif strcmp(nodeNames{k}, ...
        'Sample')
        cpt = PrSample;
    end
elseif ~isempty(strfind(model, ...
    'p1'))
    if strcmp(nodeNames{k}, 'TCF4')
        cpt = PrTCF4;
    elseif strcmp(nodeNames{k}, ...
        'BETACAT')
        cpt = PrBETACAT;
    end
end
cpdStorage(k).parentnode{1} = 0;
cpdStorage(k).node = nodeNames{k};
cpdStorage(k).cpt = cpt;
bnet.CPD{nodeidx} = tabular_CPD(...
    bnet, nodeidx, 'CPT', cpt);
end
end
```

In the same **for** loop above, the next step is to initialize probability as well as the *cpt* values for nodes with parents. Two cases exist in the current scenario, i.e nodes that (1) represent genes and (2) do not represent genes. To accommodate for gene/non-gene node classification a logical variable *GENE* is introduced. Also, before entering the second **for** loop described below, a variable *gene\_cpd* of the format structure

is defined for storage of the to be computed *cpt* values for all genes in the data set. *parentidx* stores the index of the parents of the child node under consideration using the child's index in *nodeidx* via *bnet.parents{nodeidx}*. The total number of parents a child node has is contained in *noParents*.

Initially *GENE* is assigned a value of 0 indicating that the node under consideration is not a gene node. If this is the case, the `~GENE` in the **if** condition of the **for** loop below gets executed. In this case, depending on the type of the model *cpt* values of a particular node is initialized. For  $\mathcal{M}_{PBK+EI}$  and  $\mathcal{M}_{PBK}$  (model='t1' and model='t2'), the *cpt* values for nodes *BETACAT*, *DVL2* and *TRCMPLX* is stored using values in *PrBETACAT*, *PrDVL2* and *PrTRCMPLX*. As before, using function *tabular\_CPD* and values in *nodeidx*, *bnet* and *cpt* as input arguments, the respective *cpt* is initialized in *bnet.CPD{nodeidx}*. Similar computations are done for  $\mathcal{M}_{NB+PBK}$  i.e model 'p1' for node *TRCMPLX*. Finally, the indices of the parents of the  $k^{th}$  child node is stored in *cpdStorage(k).parentnode{m}*.

On the other hand, if the name of the node in the  $k^{th}$  index of *nodeNames* matches the name in the  $l^{th}$  index of *uniqueGenes*, a parent variable of format cell is defined within the second nested **for** loop below. The names of the parents are stored in this variable using *nodeNames{parentidx(n)}*. Next, the *cpt* values of these parent nodes are separately stored using a cell *parent\_cpd* and a count *cnt*. Finally, the *cpd* values for the  $l^{th}$  gene is determined using the function *generateGenecpd* in the script *generateGenecpd.m* that takes the following input arguments (1) *vecTraining* - gene expression of from training data (2) *labelTraining* - labels for training data (3) *nodeName* - name of the gene involved (4) *parent* - name of parents of the child node or the gene under consideration (5) *parent\_cpd* - parent *cpd* values (6) *model* - kind of model and finally returns the output as a structure *gene\_cpd* containing *cpd* for the particular gene under consideration given its parents as well as a threshold value in the form of median. In the code below, the values of the following variables go as input arguments for the function *generateGenecpd*, in order (1) *dataForTraining(1, :)* - training data for the  $l^{th}$  unique gene, (2) *labelForTraining* - labels for training data, (3) *uniqueGenes{1}*, (4) *parent*, (5) *parent\_cpd*, (6) *model*. The output of the function is stored in the structure variable *x*. The threshold at which the probabilities were computed for the  $l^{th}$  gene is stored in *gene\_cpd(1).vecmedian* using *x.vecmedian* and the probabilities themselves are stored in *gene\_cpd(1).T* using *x.T*. These probabilities are reshaped into a row vector and stored in *cpt*. As mentioned before, using function *tabular\_CPD* and values in *nodeidx*, *bnet* and *cpt* as input arguments,

the respective cpt is initialized in `bnet.CPD{nodeidx}`. Finally, required values of cpt, name of  $l^{th}$  gene or  $k^{th}$  node and indices of its parent nodes are stored in `cpdStorage(k).cpt`, `cpdStorage(k).node` and `cpdStorage(k).parentnode{m}`, respectively.

It should be noted that the exposition of the generation of probability values for the different genes via the function `generateGenecpd` needs a separate treatment and will be addressed later. To maintain the continuity of the workflow of the program, the next step is addressed after the code below.

```
% Store probabilities for nodes with
% parents
gene_cpd = struct([]);
for k = 1:N
    nodeidx = bnet.names(nodeNames{k});
    if ~isempty(bnet.parents{nodeidx})
        parentidx = bnet.parents{nodeidx};
        noParents = length(parentidx);
        GENE = 0;
        for l = 1:noGenes
            if strcmp(nodeNames{k},...
                uniqueGenes{l})
                % Find cpt of gene parent
                parent = {};
                for n = 1:noParents
                    parent{n} = ...
                        nodeNames{parentidx(n)};
                end
                % Assign cpd to parent
                cnt = 0;
                parent_cpd = {};
                for m = 1:length(cpdStorage)
                    for n = 1:noParents
                        if strcmp(parent{n},...
                            cpdStorage(m).node)
                            cnt = cnt + 1;
                            parent_cpd{cnt} = ...
                                cpdStorage(m).cpt;
                        end
                    end
                end
            end
        end
        x = generateGenecpd(...
            dataForTraining(l,:),...
            labelForTraining,...
            uniqueGenes{l}, parent,...
            parent_cpd, model);
        gene_cpd(l).vecmedian = ...
            x.vecmedian;
        gene_cpd(l).T = x.T;
        [r, c] = size(gene_cpd(l).T);
        cpt = reshape(gene_cpd(l).T,1,r*c);
```

```
        GENE = 1;
        break;
    end
end
% tables for non-gene measurements
if ~GENE
    if ~isempty(strfind(model,'t1'))
        if strcmp(nodeNames{k},'BETACAT')
            cpt = PrBETACAT;
        elseif strcmp(nodeNames{k},'DVL2')
            cpt = PrDVL2;
        elseif strcmp(nodeNames{k},'TRCMPLX')
            cpt = PrTRCMPLX;
        end
    elseif ~isempty(strfind(model,'t2'))
        if strcmp(nodeNames{k},'BETACAT')
            cpt = PrBETACAT;
        elseif strcmp(nodeNames{k},'DVL2')
            cpt = PrDVL2;
        elseif strcmp(nodeNames{k},'TRCMPLX')
            cpt = PrTRCMPLX;
        end
    elseif ~isempty(strfind(model,'p1'))
        if strcmp(nodeNames{k},'TRCMPLX')
            cpt = PrTRCMPLX;
        end
    end
end
% record the parent index
for m = 1:noParents
    cpdStorage(k).parentnode{m} = ...
        parentidx(m);
end
cpdStorage(k).node = nodeNames{k};
cpdStorage(k).cpt = cpt;
bnet.CPD{nodeidx} = ...
    tabular_CPD(bnet,nodeidx,'CPT',cpt);
end
end
```

**2.4.2 Evidence building and inference** The values estimated in `gene_cpd` as well as `cpdStorage` are stored for each and every run of the hold out experiment. Also, the dimensions of the testing data is stored.

```
% Function to store estimated
% parameters
Runs(runCnt).geneCpd = gene_cpd;
Runs(runCnt).cpdStorage = cpdStorage;

% Function to predict on test data
% using trained BN
[r, c] = size(dataForTesting);
```

Next, depending on the type of the evidence provided in `evidence`, inferences can be made. Below, a section of code for evidence gene expression, which gets executed when the `case` 'ge' matches with the parameter `evidence` of the `switch` command, is explained. The issue that was to be investigated was whether the  $\beta$ -catenin based *TRCMPLX* is always switched on (off) or not when the *Sample* is cancerous (normal). In order to analyze this biological issue from a computational perspective, it would be necessary to observe the behaviour of the predicted states of both *TRCMPLX* as well as *Sample*, given all the available evidence. For this purpose, variable `tempTRCMPLXgivenAllge` is defined as a vector for each model separately, while variable `tempSAMPLE` is defined as a vector for biologically inspired models i.e  $M_{PBK+EI}$  and  $M_{PBK}$  separately. This is so due to the assumption that the state of *TRCMPLX* is the same as the state of the test sample under consideration in the  $M_{NB+MPBK}$  (a modification of Verhaegh *et al.*<sup>2</sup>).

In the section of the code below, **for** each of the test dataset an evidence variable of the format cell is defined. The evidence is of the size of equivalent to the number of node *N* in the network. Only those indicies in the cell will be filled for which information is available from the test data. Since the function `twoHoldOutExp` started with 'ge' as an argument for type of evidence, `evidence` will be constructed from information available via gene expression from the test data. Thus for the  $m^{th}$  gene, if the gene expression in the test data (i.e `dataForTesting(m,k)`) is lower than the threshold generated using the median of expressions for this gene in the training data (i.e `gene_cpd(m).vecmedian`), then the evidence for this gene is considered as inactive or repressed, i.e `evidence{bnet.names(uniqueGenes(m))} = 1`, else the evidence for this gene is considered active or expressed i.e `evidence{bnet.names(uniqueGenes(m))} = 2`. Iterating through all the genes, the evidence is initialized with the available information for the  $k^{th}$  test data.

Once the probability values have been initialized either by computation or assumption, then for the  $k^{th}$  test data, a Bayesian network engine is generated and stored in `bnetEngine` via the junction tree algorithm implemented in function `jtree_inf_engine` that uses the input argument as the newly initialized network stored in `bnet`. The `bnetEngine` is then fed with the values in `evidence` to generate a new engine that contains the updated probability values for nodes without evidence in the network. This is done using the function `enter_evidence`. According to BNT provided by Murphy *et al.*<sup>15</sup>, in the case of the `jtree` engine, `enter_evidence` implements a two-pass message-passing scheme. The first return argument (`engine`) contains the modified engine, which incorporates the evidence. The second return argument (`loglik`) contains the log-likelihood

of the evidence. It is the first returned argument or the modified engine that will be of use further. It is important to note that for every iteration that points to a new test data in the **for** loop, a new Bayesian network engine is generated and stored in `bnetEngine`. If this is not done, then the phenomena of *explaining away* can occur on feeding new evidence to an already modified engine which incorporated the evidence from the previous test data. In *explaining away* the entrance of new evidence might outweigh the effect of an existing influencing factor or evidence thus making the old evidence redundant. This simulation is not related to such study of explaining away.

Finally, the belief that the *TRCMPLX* is switched on given the gene expression evidence i.e  $Pr(TRCMPLX = 2|ge \text{ as evidence})$  is computed by estimating the marginal probability values using the function `marginal_nodes` which takes the engine stored in `engine` and the name of the node using `bnet.names('TRCMPLX')`. The marginal probabilities are stored in `margTRCMPLX`. The final probability of *TRCMPLX* being switched on given all gene expression evidences is stored in `tempTRCMPLXgivenAllge` using `margTRCMPLX.T(2)`. Similarly, for biologically inspired models the belief that the test *Sample* is cancerous given the gene expression evidence i.e  $Pr(Sample = 2|ge \text{ as evidence})$  is computed using function `marginal_nodes` that takes the engine stored in `engine` and the name of the node using `bnet.names('Sample')`. The marginal probabilities are stored in `margSAMPLE`. The final probability of *Sample* being cancerous given all gene expression evidences is stored in `tempSAMPLE` using `margSAMPLE.T(2)`.

```
switch evidence
case 'ge'
    disp(['Testing Example ', ...
        num2str(runCnt), ...
        ' - Based on all ge']);
    tempTRCMPLXgivenAllge = [];
    if ~isempty(strfind(model, 't'))
        tempSAMPLE = [];
    end
    % Build evidence for inference
    for k = 1:c
        evidence = cell(1,N);
        for m = 1:noGenes
            if dataForTesting(m,k) <= ...
                gene_cpd(m).vecmedian
                evidence{bnet.names(...
                    uniqueGenes(m))} = 1;
            else
                evidence{bnet.names...
                    (uniqueGenes(m))} = 2;
            end
        end
    end
end
```



```
% Build Bayesian engine
bnetEngine = jtree_inf_engine(bnet);
[engine, loglik] = ...
    enter_evidence(bnetEngine,evidence);

% Pr(TRCMPLX = 2|ge as evidence)
margTRCMPLX = marginal_nodes(...
    engine,bnet.names('TRCMPLX'));
tempTRCMPLXgivenAllge = ...
    [tempTRCMPLXgivenAllge,...
    margTRCMPLX.T(2)];

if ~isempty(strfind(model, 't'))
    % Pr(Sample = 2|ge as evidence)
    margSAMPLE = marginal_nodes(...
        engine,bnet.names('Sample'));
    tempSAMPLE = [tempSAMPLE,...
        margSAMPLE.T(2)];
end
end
```

Finally, for the particular count of the run of the experiment, `tempTRCMPLXgivenAllge` and `tempSAMPLE` are stored in the structure `Runs` using different variables associated with `Runs`. This iteration keeps happening until the two hold out experiment is exhausted. The case when `evidence` is 'me' or evidence for methylation will be discussed later as a programming project.

```
% Function to store prediction values
Runs(runCnt).condPrTRCMPLXgivenAllge...
    = tempTRCMPLXgivenAllge;
if ~isempty(strfind(model, 't'))
    Runs(runCnt).condPrSAMPLE =...
        tempSAMPLE;
end
case 'me'
    % Project discussed later
end
end
end
```

## 2.5 Storing results, plotting graphs and saving files

The final section of the code deals with storing of the results, plotting of graphs and saving the results in the files. Since the current explanation is for gene expression evidence, the code pertaining to 'ge' is explained. Readers might want to develop the code for evidence regarding methylation as a programming project.

To store results as well as the conditional probabilities for *TRCMPLX* and *SAMPLE* given all the gene expression evidence, a cell variable `Results`, a counter `cntResult`

and vector variables `condPrTRCMPLXgivenAllge`, `condPrSAMPLE` and `labels` are defined as well as initialized. Next, the prediction values and original labels are stored while iterating through the total number of runs of the experiment. This is done using the `for` loop and the variable `runCnt`. For the  $i^{th}$  run, predicted conditional probabilities of *TRCMPLX* and *Sample* from each run is stored in `condPrTRCMPLXgivenAllge(i,:)` and `condPrSAMPLE(i,:)`, depending on the model used. Finally, the ground truth labels of the test data are stored in a matrix where the  $i^{th}$  row is initialized with `labels(i,:) = [-1, +1];`. Here, labels in a matrix and  $-1$  ( $+1$ ) represent normal (cancerous) cases. Next, the variables `condPrTRCMPLXgivenAllge` and `condPrSAMPLE` are reshaped into vectors for further processing.

The plotting of the ROC curves and the estimation of their respective AUCs is achieved using function `perfcurve` that takes labels, either of the vectors `condPrTRCMPLXgivenAllge` or `condPrSAMPLE` depending on the type of model selected. The function churns out useful information in the form of the false positive rate in X, the true positive rate in Y and the estimated AUC for ROC of `condPrTRCMPLXgivenAllge` (`condPrSAMPLE`) in `AUCTRCMPLXgivenAllge` (`AUCSAMPLE`). The `plot` function is used to draw the graphs along with the depiction of legends using function `legend`. Finally, the two sample Kolmogorov-Smirnov test between the predictions of states of *TRCMPLX* and *Sample* is performed using the `kstest2` function. This function takes the two vectors `condPrTRCMPLXgivenAllge` and `condPrSAMPLE` as arguments, compares the distribution of the predictions and returns the state of significance between the two distributions in `h01`. If the value of `h01` is 1, then statistical significance exists else it does not exist. Sinha<sup>1</sup> shows that the statistical difference exists between predictions of *TRCMPLX* and *Sample* when the nodes for the same are segregated in the biologically inspired causal models, which is not the case with the naive Bayes model.

Lastly, the computed variables are stored in a `.mat` file using the function `save`. Options for using the `save` function can be obtained from the help command in Matlab.

```
if strcmp(evidence, 'ge')
    % Store results
    Results = {};
    cntResult = 0;
    % Estimation of performance levels
    condPrTRCMPLXgivenAllge = [];
    geneEvidence = {};
    if ~isempty(strfind(model, 't'))
        condPrSAMPLE = [];
    end
```

```
labels = [];  
  
% Store prediction values and  
% original labels  
for i = 1:runCnt  
    condPrTRCMPLXgivenAllge(i,:) =...  
        Runs(i).condPrTRCMPLXgivenAllge;  
geneEvidence{i} = Runs(i).geneEvidence;  
    if ~isempty(strfind(model,'t'))  
        condPrSAMPLE(i,:) =...  
            Runs(i).condPrSAMPLE;  
    end  
    labels(i,:) = [-1, +1];  
end  
  
% Reshape the vectors  
[r,c] = size(labels);  
labels = reshape(labels,r*c,1);  
condPrTRCMPLXgivenAllge =...  
    reshape(condPrTRCMPLXgivenAllge,...  
        r*c,1);  
if ~isempty(strfind(model,'t'))  
    condPrSAMPLE =...  
        reshape(condPrSAMPLE,r*c,1);  
end  
  
% Plot the ROC curve and compute AUC  
[X,Y,T,AUCTRCMPLXgivenAllge] =...  
    perfcurve(labels,...  
        condPrTRCMPLXgivenAllge,1);  
plot(X,Y,'r');  
xlabel('False positive rate');  
ylabel('True positive rate');  
if ~isempty(strfind(model,'t'))  
    hold on;  
    [X,Y,T,AUCSAMPLE] =...  
        perfcurve(labels,condPrSAMPLE,1);  
    plot(X,Y,'b');  
    legend('TRCMPLX - On','SAMPLE - T');  
    hold off;  
  
% Perform ks-test the significance  
% between models/evidences/predictions  
[h01,p,ksstat] =...  
    kstest2(condPrTRCMPLXgivenAllge,...  
        condPrSAMPLE);  
end  
  
if ~isempty(strfind(model,'t1'))  
    save('Results.mat','Runs',...  
        'condPrTRCMPLXgivenAllge',...  
        'geneEvidence','condPrSAMPLE',...  
        'AUCTRCMPLXgivenAllge','AUCSAMPLE',  
        'h01');
```

```
'AUCTRCMPLXgivenAllge','AUCSAMPLE',  
    'h01');  
elseif ~isempty(strfind(model,'t2'))  
    save('Results.mat','Runs',...  
        'condPrTRCMPLXgivenAllge',...  
        'geneEvidence','condPrSAMPLE',...  
        'AUCTRCMPLXgivenAllge','AUCSAMPLE',  
        'h01');  
elseif ~isempty(strfind(model,'p1'))  
    save('Results.mat','Runs',...  
        'condPrTRCMPLXgivenAllge',...  
        'geneEvidence',...  
        'AUCTRCMPLXgivenAllge');  
end  
else  
end
```

The ROC graphs and their respective AUC values found in the figures of Sinha<sup>1</sup> are plotted by making variation in the assumed probability values of PrTRCMPLX in the function generateGenecpd that will be discussed later. Interpretations of the results can be studied in more depth from Sinha<sup>1</sup>.

Finally, a full section is dedicated to the computation of the probabilities for nodes with parents which has been implemented in function generateGenecpd.

## 2.6 Generating probabilities for gene nodes with parents

Here, the code for the function generateGenecpd is explained. As a recapitulation, the function generateGenecpd in the script *generateGenecpd.m* takes the following input arguments (1) vecTraining - gene expression of from training data (2) labelTraining - labels for training data (3) nodeName - name of the gene involved (4) parent - name of parents of the child node or the gene under consideration (5) parent\_cpd - parent cpd values (6) model - kind of model and finally returns the output as a structure gene\_cpd containing cpd for the particular gene under consideration given its parents as well as a threshold value in the form of median. In the code below, the values of the following variables go as input arguments for the function generateGenecpd, in order (1) dataForTraining(1,:) - training data for the  $l^{th}$  unique gene, (2) labelForTraining - labels for training data, (3) uniqueGenes{1}, (4) parent, (5) parent\_cpd, (6) model. The output of the function is stored in the structure variable x. The threshold at which the probabilities were computed for the  $l^{th}$  gene is stored in gene\_cpd(1).vecmedian using x.vecmedian and the probabilities themselves are stored in gene\_cpd(1).T using x.T.

The code begins with the storing of the dimension of a gene expression vector in vecTraining in r and c and recording the length of the vector containing the labels for the training

data (in labelTraining) in lencond. Finally, the much reported threshold is estimated here using the median of the training data and stored in vecmedian.

```
% Rows is the gene expression and...
% columns are conditions (normal or
% cancerous)
[r, c] = size(vecTraining);
lencond = length(labelTraining);
```

```
% Take median as the threshold
vecmedian = median(vecTraining);
```

In Sinha<sup>1</sup>, the effect of *TRCMPLX* on the gene expression has been analysed as it is not known to what degree the *TRCMPLX* plays a role in the Wnt signaling pathway. To investigate this Sinha<sup>1</sup> incorporated a parameter  $p$  that encodes the effect of *TRCMPLX* on the expression of the gene which is influenced by it. Thus while iterating through the list of parents if one encounters *TRCMPLX* as a parent, then  $p$  is initialized to a certain value. In Sinha<sup>1</sup>, the effect of *TRCMPLX* being active ( $1 - p$ ) is incremented in steps of 0.1 from {0.5 to 0.9} and respective ROC graphs are plotted using the same.

```
% Defining affect of TRCMPLX on
% gene expression
noParents = length(parent);
for i = 1:noParents
    if ~isempty(strfind(model, 't'))
        if strfind(parent{i}, 'TRCMPLX')
            p = 0.5;
        end
    end
end
```

It is important to note that the computation of gene probabilities differ from model to model and a detailed description of each computation is given for each gene for all three models, before explaining the computation for another gene. Also, from Sinha<sup>1</sup>, theoretically, for a gene  $g_i$   $\forall i$  genes, let there be  $n_{tr}$  different instances of expression values from the sample training data. Let each of the  $n_{tr}$  gene expression values be discretized to 0 and 1 based on their evaluation with respect to the median threshold. The 1's represent the total number of expression where the gene is active and 0's represent the total number of expression where the gene is inactive. In case of normal and tumorous samples, the proportions of 1's and 0's may be different. The median of the expression values is employed as a threshold to decide the frequency of  $g_i$  being active or inactive given the state of the parent node(s). This median is also used along with the labels of the training data to decide the status of different parent factors affecting the gene under consideration.

**2.6.1 DKK1: (model='t1')** Since there are three parents for *DKK1*, namely *MeDKK1*, *Sample* and *TRCMPLX*, the cpt values for the table is segregated based on the status of methylation and quality of samples. A  $2 \times 2$  cross table for methylation and sample generates frequency estimates that can help derive probability values. The entries of the cross table depict the following cases (a) methylated in normal (represented by vector mINn) (b) un-methylated in normal (represented by vector umINn) (c) methylated in tumorous (represented by vector mINt) and (d) un-methylated in tumorous (represented by vector umINt), cases. For every  $j^{th}$  entry in the vecTraining, if the label (labelTraining(j)) is normal ( $\leq 0$ ) and the *DKK1* gene expression (vecTraining(j)) is less than the estimated median ( $\leq$ vecmedian) then value in vecTraining(j) is appended to mINn. Here, expression level lower than median indicates probable repression due to methylation in normal case. If the label (labelTraining(j)) is normal ( $\leq 0$ ) and the *DKK1* gene expression (vecTraining(j)) is greater than the estimated median ( $\geq$ vecmedian) then value in vecTraining(j) is appended to umINn. Here, expression level greater than median indicates probable activation due to un-methylation in normal case. If the label (labelTraining(j)) is tumorous ( $\geq 0$ ) and the *DKK1* gene expression (vecTraining(j)) is less than the estimated median ( $\leq$ vecmedian) then value in vecTraining(j) is appended to mINt. Here, expression level lower than median indicates probable repression due to methylation in tumorous case. And finally, If the label (labelTraining(j)) is tumorous ( $\geq 0$ ) and the *DKK1* gene expression (vecTraining(j)) is greater than the estimated median ( $\geq$ vecmedian) then value in vecTraining(j) is appended to umINt. Here, expression level greater than median indicates probable activation due to un-methylation in tumorous case.

```
% Segregate values based on status
% of methylation and samples
mINn = [];
umINn = [];
mINt = [];
umINt = [];
for j = 1:lencond
    if labelTraining(j) < 0 && ...
        vecTraining(j) < vecmedian
        mINn = [mINn, vecTraining(j)];
    elseif labelTraining(j) < 0 && ...
        vecTraining(j) >= vecmedian
        umINn = [umINn, vecTraining(j)];
    elseif labelTraining(j) > 0 && ...
        vecTraining(j) < vecmedian
```

```
mINT = [mINT, vecTraining(j)];
else
  umINT = [umINT, vecTraining(j)];
end
end
end
```

Before estimating the values for cpt of *DKK1*, it is important to see how (1) the probability table would look like and (2) the probability table is stored in BNT (Murphy *et al.*<sup>15</sup>). Table 8 represents the conditions of sample as well as the methylation along with transcription complex and the probable beliefs of events (*DKK1* being on/off). With three parents and binary state, the total number of conditions is  $2^3$ . To estimate the values of the probable beliefs of an event, the following computation is done. (**Case - *TRCMPLX* is Off**) The  $\Pr(DKK1 - \text{On} | \text{Sample} - \text{Normal}, \text{Me} - \text{UM})$  being low, is the fraction of number of 1's in the normal sample ( $a \times p$ ) and the sum of total number of normal samples and number of 1's in the tumorous samples, i.e the non-methylated gene expression values in tumorous samples (A). Similarly,  $\Pr(DKK1 - \text{On} | \text{Sample} - \text{Tumor}, \text{Me} - \text{UM})$  being low, is the fraction of number of 1's in the tumorous sample ( $b \times p$ ) and the sum of total number of tumorous samples and number of 1's in the normal samples, i.e the non-methylated gene expression values in normal samples (B). Again,  $\Pr(DKK1 - \text{Off} | \text{Sample} - \text{Normal}, \text{Me} - \text{M})$  being high, is the fraction of number of 0's in the normal sample ( $c \times p$ ) and the sum of total number of normal samples and number of 0's in the tumorous samples, i.e the methylated gene expression values in tumorous samples (C). Finally,  $\Pr(DKK1 - \text{Off} | \text{Sample} - \text{Tumor}, \text{Me} - \text{M})$  being high, is the fraction of number of 0's in the tumorous sample ( $d \times p$ ) and the sum of total number of tumorous samples and number of 0's in the normal samples, i.e the methylated gene expression values in normal samples (D).

(**Case - *TRCMPLX* is On**) Next, the  $\Pr(DKK1 - \text{On} | \text{Sample} - \text{Normal}, \text{Me} - \text{UM})$  being low, is the fraction of number of 1's in the normal sample ( $a \times (1 - p)$ ) and the sum of total number of normal samples and number of 1's in the tumorous samples, i.e the non-methylated gene expression values in tumorous samples (A). Similarly,  $\Pr(DKK1 - \text{On} | \text{Sample} - \text{Tumor}, \text{Me} - \text{UM})$  being low, is the fraction of number of 1's in the tumorous sample ( $b \times (1 - p)$ ) and the sum of total number of tumorous samples and number of 1's in the normal samples, i.e the non-methylated gene expression values in normal samples (B). Again,  $\Pr(DKK1 - \text{Off} | \text{Sample} - \text{Normal}, \text{Me} - \text{M})$  being high, is the fraction of number of 0's in the normal sample ( $c \times (1 - p)$ ) and the sum of total number of normal samples and number of 0's in the tumorous samples, i.e the methylated gene expression values in tumorous samples (C). Finally,  $\Pr(DKK1 - \text{Off} | \text{Sample} - \text{Tumor}, \text{Me} - \text{M})$  being high, is the fraction of number of 0's in the tumorous sample ( $d \times (1 - p)$ ) and the sum of total number of tumorous samples

and number of 0's in the normal samples, i.e the methylated gene expression values in normal samples (D). Complementary conditional probability values for *DKK1* being inactive can easily be computed from the above estimated values.

```
% Generate frequencies for conditional
% probability values

% pr(DKK1 - On|Sample - Normal, Me - UM)
% # of On's in Normal
a = length(umINn);
% total # of On's in Normal and
% Unmethylation
A = length(umINn) + length(mINn)...
  + length(umINT);

% pr(DKK1 - On|Sample - Tumor, Me - UM)
% # of On's in Tumor
b = length(umINT);
% total # of On's in Normal and
% Unmethylation
B = length(umINT) + length(umINn)...
  + length(mINT);

% pr(DKK1 - Off|Sample - Normal, Me - M)
% # of Off's in Normal
c = length(mINn);
% total # of Off's in Normal and...
% Methylation
C = length(mINn) + length(umINn)...
  + length(mINT);

% pr(DKK1 - Off|Sample - Tumor, Me - M)
% # of Off's in Normal
d = length(mINT);
% total # of Off's in Normal and
% Methylation
D = length(mINT) + length(umINT)...
  + length(mINn);
```

These values are stored in variable T and the estimation is shown in the following section of the code. After the values in T has been established, a constant 1 is added as pseudo count to convert the distribution to a probability distribution via Dirichlet process. This is done to remove any deterministic 0/1 values appearing in the probability tables. If 0/1 appears in the probability tables then one has deterministic evidence regarding an event and the building of the Bayesian engine collapses. Finally, the frequencies in T are normalized in order to obtain the final conditional probability values for *DKK1*. Estimation of cpts for genes *SFRP1*, *WIF1* and *DKK4* which have methylation, *TRCMPLX* and *Sample* as parents require same computations as above. Figure 5 shows the



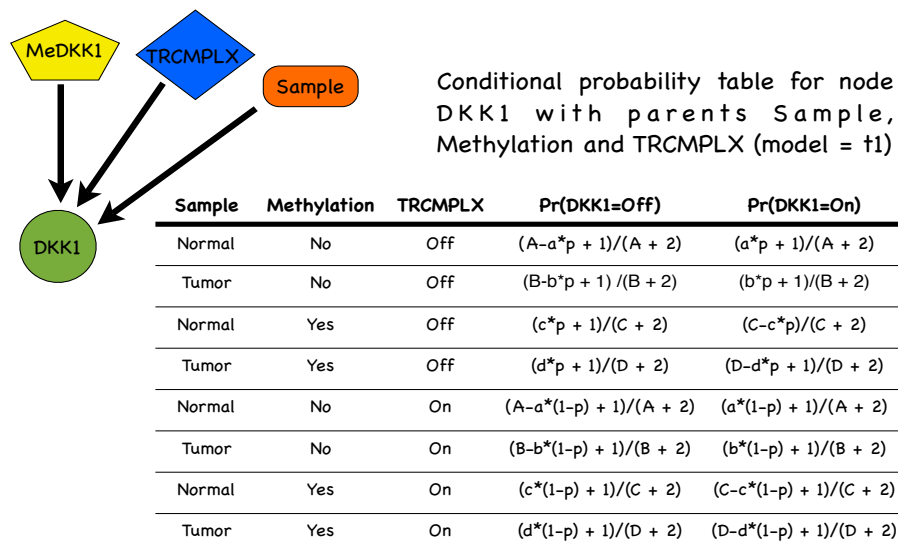

**Fig. 5** Conditional probability table for node *DKK1* in  $\mathcal{M}_{PBK+EI}$ .

| CPT for <i>DKK1</i> in $\mathcal{M}_{PBK+EI}$ (model-t1) |             |         |                       |                      |
|----------------------------------------------------------|-------------|---------|-----------------------|----------------------|
| Sample                                                   | Methylation | TRCMPLX | Pr( <i>DKK1</i> =Off) | Pr( <i>DKK1</i> =On) |
| Normal                                                   | No          | Off     | h (1)                 | l (9)                |
| Tumor                                                    | No          | Off     | h/l (2)               | l/h (10)             |
| Normal                                                   | Yes         | Off     | h (3)                 | l (11)               |
| Tumor                                                    | Yes         | Off     | h (4)                 | l (12)               |
| Normal                                                   | No          | On      | h (5)                 | l (13)               |
| Tumor                                                    | No          | On      | h/l (6)               | l/h (14)             |
| Normal                                                   | Yes         | On      | h (7)                 | l (15)               |
| Tumor                                                    | Yes         | On      | h (8)                 | l (16)               |

**Table 8** Conditional probability table for *DKK1* in  $\mathcal{M}_{PBK+EI}$  (model-t1). h - probability of event being high; l - probability of event being low. Serial numbers in brackets represent the ordering of numbers in vectorial format.

pictorial representation of one of the cpt in  $\mathcal{M}_{PBK+EI}$ .

```
% Multiply probability of TRCMPLX in
% on/off state to add the 3rd
% dimension in deciding the conditional
% probability tables.
```

```
% Conditional probability table for
% DKK1 given its parents
```

```
T = [A-a*p, a*p;...
      B-b*p, b*p;...
      c*p, C-c*p;...
      d*p, D-d*p;...
      A-a*(1-p), a*(1-p);...
      B-b*(1-p), b*(1-p);...]
```

```
c*(1-p), C-c*(1-p);...
d*(1-p), D-d*(1-p)];
[r,c] = size(T);
```

```
% Convert the table to probability
% distribution via Dirichlet process
T = T + 1;
for i = 1:r
    T(i,:) = T(i, :)/sum(T(i, :));
end
```

(**model='t2'**) There are two parents for *DKK1*, namely *TRCMPLX* and *Sample*. The conditional probability value for a gene being active or inactive is estimated based on the state of the *Sample*. But since the actual probability values for the activation of the *TRCMPLX* is not known the conditional probabilities are multiplied with a probability value of  $p$  when the *TRCMPLX* is off and with probability value  $1 - p$  when the *TRCMPLX* is on.

The analysis of quality of sample generates frequency estimates that can help derive probability values. These frequencies depict the following cases (a) gene repressed in normal (represented by vector *offINn*) (b) gene expressed in normal (represented by vector *onINn*) (c) gene repressed in tumorous (represented by vector *offINT*) and (d) gene expressed in tumorous (represented by vector *onINT*), cases. For every  $j^{th}$  entry in the *vecTraining*, if the label (*labelTraining(j)*) is normal ( $\leq 0$ ) and the *DKK1* gene expression (*vecTraining(j)*) is less than the estimated median ( $\leq \text{vecmedian}$ ) then

value in `vecTraining(j)` is appended to `offINn`. Here, expression level lower than median indicates probable gene repression in normal case. If the label (`labelTraining(j)`) is normal ( $\leq 0$ ) and the *DKK1* gene expression (`vecTraining(j)`) is greater than the estimated median ( $\geq \text{vecmedian}$ ) then value in `vecTraining(j)` is appended to `onINn`. Here, expression level greater than median indicates probable gene activation in normal case. If the label (`labelTraining(j)`) is tumorous ( $\geq 0$ ) and the *DKK1* gene expression (`vecTraining(j)`) is less than the estimated median ( $\leq \text{vecmedian}$ ) then value in `vecTraining(j)` is appended to `offINt`. Here, expression level lower than median indicates probable gene repression in tumour case. And finally, If the label (`labelTraining(j)`) is tumorous ( $\geq 0$ ) and the *DKK1* gene expression (`vecTraining(j)`) is greater than the estimated median ( $\geq \text{vecmedian}$ ) then value in `vecTraining(j)` is appended to `onINt`. Here, expression level greater than median indicates probable gene activation in tumorous case.

```
% Segregate values based on
% status of TRCMPLX
onINn = [];
offINn = [];
onINt = [];
offINt = [];
for j = 1:lencond
    if labelTraining(j) < 0 &&...
        vecTraining(j) < vecmedian
            offINn = [offINn, vecTraining(j)];
        elseif labelTraining(j) < 0 &&...
            vecTraining(j) >= vecmedian
                onINn = [onINn, vecTraining(j)];
        elseif labelTraining(j) > 0 &&...
            vecTraining(j) < vecmedian
                offINt = [offINt, vecTraining(j)];
        else
            onINt = [onINt, vecTraining(j)];
    end
end
```

Before estimating the values for `cpt` of *DKK1*, it is important to see how (1) the probability table would look like and (2) the probability table is stored in BNT (Murphy *et al.*<sup>15</sup>). Table 9 represents the conditions of *Sample* as well as *TRCMPLX* and the probable beliefs of events (*DKK1* being on/off). With two parents and binary state, the total number of conditions is  $2^2$ . To estimate the values of the probable beliefs of an event, the following computation is done. The probability of gene expression being active given *Sample* is normal and *TRCMPLX* is off i.e  $\Pr(DKK1 = \text{Active} | \text{Sample} = \text{Normal}, \text{TRCMPLX} = \text{Off})$ , is the fraction of

| CPT for <i>DKK1</i> in $\mathcal{M}_{PBK}$ (model-t2) |                |                        |                       |
|-------------------------------------------------------|----------------|------------------------|-----------------------|
| <i>Sample</i>                                         | <i>TRCMPLX</i> | $\Pr(DKK1=\text{Off})$ | $\Pr(DKK1=\text{On})$ |
| Normal                                                | Off            | h (1)                  | l (5)                 |
| Tumorous                                              | Off            | l (2)                  | h (6)                 |
| Normal                                                | On             | h (3)                  | l (7)                 |
| Tumorous                                              | On             | l (4)                  | h (8)                 |

**Table 9** Conditional probability table for *DKK1* in  $\mathcal{M}_{PBK}$  (model-t2). h - probability of event being high; l - probability of event being low. Serial numbers in brackets represent the ordering of numbers in vectorial format.

number of 1's in the normal sample ( $a \times p$ ) and the sum of total number of normal samples (A). Similarly, the probability of gene expression being active given *Sample* is tumorous and *TRCMPLX* is off i.e  $\Pr(DKK1 = \text{active} | \text{Sample} = \text{tumorous}, \text{TRCMPLX} = \text{Off})$ , is the fraction of number of 1's in the tumorous sample ( $b \times p$ ) and the sum of total number of tumorous samples (B). Again, the probability of gene expression being inactive given *Sample* is normal and *TRCMPLX* is on i.e  $\Pr(DKK1 = \text{inactive} | \text{Sample} = \text{normal}, \text{TRCMPLX} = \text{On})$ , is the fraction of number of 0's in the normal sample ( $A - a \times (1 - p)$ ) and the sum of total number of normal samples (A). Lastly, the probability of gene expression being inactive given *Sample* is tumorous and *TRCMPLX* is on i.e  $\Pr(DKK1 = \text{inactive} | \text{Sample} = \text{tumorous}, \text{TRCMPLX} = \text{On})$ , is the fraction of number of 0's in the tumorous sample ( $B - b \times (1 - p)$ ) and the sum of total number of tumorous samples (b). Complementary conditional probability values for *DKK1* being inactive can easily be computed from the above estimated values.

```
% Generate frequencies for conditional
% probability values
% pr(DKK1 - On|Sample - N,TRCMPLX - Off)
% # of On's when Sample is N
a = length(onINn);
% total # of TRCMPLX is Off
A = length(onINn) + length(offINn);

% pr(DKK1 - On|Sample - T,TRCMPLX - Off)
% # of On's when Sample is T
b = length(onINt);
% total # of TRCMPLX is On
B = length(onINn) + length(offINt);

% Conditional probability table
% for DKK1 given its parents
T = [A-a*p, a*p;...
     B-b*p, b*p;...
     A-a*(1-p), a*(1-p);...
     B-b*(1-p), b*(1-p)];
```

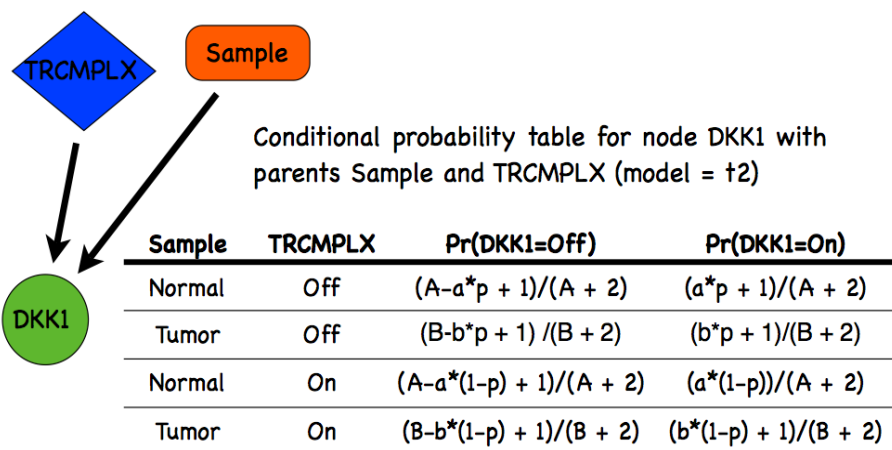

Fig. 6 Conditional probability table for node *DKK1* in  $\mathcal{M}_{PBK}$ .

```
[r, c] = size(T);
```

After the values in *T* has been established, a constant 1 is added as pseudo count to convert the distribution to a probability distribution via Dirichlet process. Finally, the frequencies in *T* are normalized in order to obtain the final conditional probability values for *DKK1*. Estimation of cpts for genes *SFRP1*, *CCND1*, *CD44*, *WIF1*, *MYC* and *DKK4* which has *TRCMPLX* and *Sample* as parents require same computations as above. Figure 6 shows the pictorial representation of one of the cpt in  $\mathcal{M}_{PBK}$ .

```
% Convert the table to probability
% distribution via Dirichlet process
T = T + 1;
for i = 1:r
    T(i, :) = T(i, :)/sum(T(i, :));
end
```

(model='p1') Following the Naive Bayes model presented by Verhaegh *et al.*<sup>2</sup> and making slight modifications to it, Sinha<sup>1</sup> generated  $\mathcal{M}_{NB+MPBK}$ . In this all genes have a single parent, namely *TRCMPLX* and it is assumed that the predicted state of *TRCMPLX* is exactly the same as the quality of the test sample. Thus the initial probability values for *TRCMPLX* are assumed to be fixed and no variation is made on it. The conditional probability value for a gene being active or inactive is estimated based on the state of the *TRCMPLX*.

The segregation of the probability values depends on the following conditions (a) gene is active and *TRCMPLX* is on (represented by vector *onINTrOn*) (b) gene is inactive and *TRCMPLX* is off (represented by vector *offINTrOn*) (c) gene is active and *TRCMPLX* is off (represented by vector *onINTrOff*) and (d) gene is inactive (represented by vector

*offINTrOff*). For every  $j^{th}$  entry in the *vecTraining*, if the label (*labelTraining(j)*) is  $\leq 0$  (*TRCMPLX* is off) and the *DKK1* gene expression (*vecTraining(j)*) is less than the estimated median ( $\leq \text{vecmedian}$ ) then value in *vecTraining(j)* is appended to *offINTrOff*. If the label (*labelTraining(j)*) is  $\leq 0$  (*TRCMPLX* is off) and the *DKK1* gene expression (*vecTraining(j)*) is greater than the estimated median ( $\geq \text{vecmedian}$ ) then value in *vecTraining(j)* is appended to *onINTrOff*. If the label (*labelTraining(j)*) is  $\geq 0$  (*TRCMPLX* is on) and the *DKK1* gene expression (*vecTraining(j)*) is less than the estimated median ( $\leq \text{vecmedian}$ ) then value in *vecTraining(j)* is appended to *offINTrOn*. And finally, if the label (*labelTraining(j)*) is  $\geq 0$  (*TRCMPLX* is on) and the *DKK1* gene expression (*vecTraining(j)*) is greater than the estimated median ( $\geq \text{vecmedian}$ ) then value in *vecTraining(j)* is appended to *onINTrOn*.

```
% Segregate values based on
% status of TRCMPLX
onINTrOn = [];
offINTrOn = [];
onINTrOff = [];
offINTrOff = [];
for j = 1:lencond
    if labelTraining(j) < 0 &&...
        vecTraining(j) < vecmedian
        offINTrOff = [offINTrOff, ...
            vecTraining(j)];
    elseif labelTraining(j) < 0 &&...
        vecTraining(j) >= vecmedian
        onINTrOff = [onINTrOff, ...
            vecTraining(j)];
```

| CPT for <i>DKK1</i> in $\mathcal{M}_{NB+PBK}$ (model-p1) |                       |                      |
|----------------------------------------------------------|-----------------------|----------------------|
| <i>TRCMPLX</i>                                           | Pr( <i>DKK1</i> =Off) | Pr( <i>DKK1</i> =On) |
| Off                                                      | h (1)                 | l (3)                |
| On                                                       | h (2)                 | l (4)                |

**Table 10** Conditional probability table for *DKK1* in  $\mathcal{M}_{NB+MPBK}$  (model-p1). h - probability of event being high; l - probability of event being low. Serial numbers in brackets represent the ordering of numbers in vectorial format.

```
elseif labelTraining(j) > 0 &&...
    vecTraining(j) < vecmedian
    offINTrOn = [offINTrOn,...
    vecTraining(j)];
else
    onINTrOn = [onINTrOn,...
    vecTraining(j)];
end
```

Before estimating the values for cpt of *DKK1*, it is important to see how (1) the probability table would look like and (2) the probability table is stored in BNT (Murphy *et al.*<sup>15</sup>). Table 10 represents the conditions of *TRCMPLX* and the probable beliefs of events (*DKK1* being on/off). With a single parent and binary state, the total number of conditions is  $2^1$ . To estimate the values of the probable beliefs of an event, the following computation is done. The probability of gene expression being active given *TRCMPLX* is off i.e Pr(*DKK1* = Active | *TRCMPLX* = Off), is the fraction of number of 1's in the normal sample (a) and the sum of total number of normal samples (A). Similarly, the probability of gene expression being inactive given *TRCMPLX* is off i.e Pr(*DKK1* = active | *TRCMPLX* = On), is the fraction of number of 1's in the tumorous sample (b) and the sum of total number of tumorous samples (B). Complementary conditional probability values for *DKK1* being inactive can easily be computed from the above estimated values. Figure 6 shows the pictorial representation of one of the cpt in  $\mathcal{M}_{PBK}$ .

```
% Generate frequencies for
% conditional probability values
% pr(DKK1 - On | TRCMPLX - Off)
% # of On's when TRCMPLX is Off
a = length(onINTrOff);
% total # of TRCMPLX is Off
A = length(onINTrOff) + length(offINTrOff);

% pr(DKK1 - On | TRCMPLX - On)
% # of On's when TRCMPLX is On
b = length(onINTrOn);
% total # of TRCMPLX is On
```

```
B = length(onINTrOn) + length(offINTrOn);

% Conditional probability table
% for DKK1 given its parents
T = [A-a, a;...
    B-b, b];
[r,c] = size(T);
```

After the values in T has been established, a constant 1 is added as pseudo count to convert the distribution to a probability distribution via Dirichlet process. Finally, the frequencies in T are normalized in order to obtain the final conditional probability values for *DKK1*. Figure 7 shows the pictorial representation of one of the cpt in  $\mathcal{M}_{NB+MPBK}$ .

```
% Convert the table to probability
% distribution via Dirichlet process
T = T + 1;
for i = 1:r
    T(i,:) = T(i,)./sum(T(i,:));
end
```

**2.6.2 DKK2: (model-'t1')** *Sample* is the single parent of *DKK2*. The conditional probability value for a gene being active or inactive is estimated based on the state of the *Sample*. The analysis of quality of sample generates frequency estimates that can help derive probability values. These frequencies depict the following cases (a) gene repressed in normal (represented by vector offINn) (b) gene expressed in normal (represented by vector onINn) (c) gene repressed in tumorous (represented by vector offINT) and (d) gene expressed in tumorous (represented by vector onINT), cases. For every  $j^{th}$  entry in the vecTraining, if the label(labelTraining(j)) is normal ( $\leq 0$ ) and the *DKK2* gene expression (vecTraining(j)) is less than the estimated median ( $\leq$ vecmedian) then value in vecTraining(j) is appended to offINn. Here, expression level lower than median indicates probable gene repression in normal case. If the label (labelTraining(j)) is normal ( $\leq 0$ ) and the *DKK2* gene expression (vecTraining(j)) is greater than the estimated median ( $\geq$ vecmedian) then value in vecTraining(j) is appended to onINn. Here, expression level greater than median indicates probable gene activation in normal case. If the label (labelTraining(j)) is tumorous ( $\geq 0$ ) and the *DKK2* gene expression (vecTraining(j)) is less than the estimated median ( $\leq$ vecmedian) then value in vecTraining(j) is appended to offINT. Here, expression level lower than median indicates probable gene repression in tumour case. And finally, If the label (labelTraining(j)) is tumorous ( $\geq 0$ ) and the *DKK2* gene expression (vecTraining(j)) is greater than the estimated median ( $\geq$ vecmedian) then value



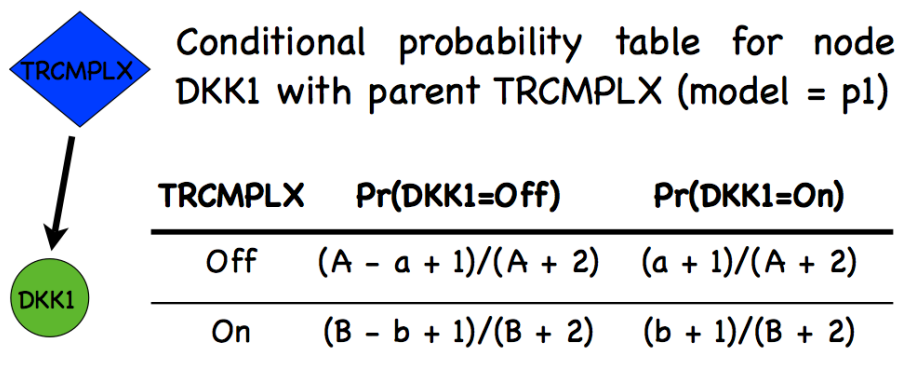

Fig. 7 Conditional probability table for node *DKK1* in  $\mathcal{M}_{NB+MPBK}$ .

| CPT for <i>DKK2</i> in $\mathcal{M}_{NB+PBK}$ (model-t1) |                       |                      |
|----------------------------------------------------------|-----------------------|----------------------|
| <i>Sample</i>                                            | Pr( <i>DKK2</i> =Off) | Pr( <i>DKK2</i> =On) |
| Normal                                                   | l/h (1)               | h/l (3)              |
| Tumor                                                    | h/l (2)               | l/h (4)              |

**Table 11** Conditional probability table for *DKK2* in  $\mathcal{M}_{NB+MPBK}$  (model-t1). h - probability of event being high; l - probability of event being low. Serial numbers in brackets represent the ordering of numbers in vectorial format.

in `vecTraining(j)` is appended to `onINt`. Here, expression level greater than median indicates probable gene activation in tumorous case.

```
% Segregate values based on
% different types of samples
onINn = [];
offINn = [];
onINt = [];
offINt = [];
for j = 1:lencond
    if labelTraining(j) < 0 &&...
        vecTraining(j) < vecmedian
            offINn = [offINn, vecTraining(j)];
    elseif labelTraining(j) < 0 &&...
        vecTraining(j) >= vecmedian
            onINn = [onINn, vecTraining(j)];
    elseif labelTraining(j) > 0 &&...
        vecTraining(j) < vecmedian
            offINt = [offINt, vecTraining(j)];
    else
        onINt = [onINt, vecTraining(j)];
    end
end
```

Before estimating the values for cpt of *DKK2*, it is important to see how (1) the probability table would look like and (2) the probability table is stored in BNT (Murphy *et al.*<sup>15</sup>). Table 11 represents the conditions of *Sample* and the probable beliefs of events (*DKK2* being on/off). With a single parent and binary state, the total number of conditions is  $2^1$ . To estimate the values of the probable beliefs of an event, the following computation is done. The probability of gene expression being active given *Sample* is normal i.e Pr(*DKK2* = Active | *Sample* = Normal), is the fraction of number of 1's in the normal sample (a) and the sum of total number of normal samples (A). Similarly, the probability of gene expression being active given *Sample* is tumorous i.e Pr(*DKK2* = active | *Sample* = Tumorous), is the fraction of number of 1's in the tumorous sample (b) and the sum of total number of tumorous samples (B). Complementary conditional probability values for *DKK2* being inactive can easily be computed from the above estimated values.

```
% Generate frequencies for
% conditional probability values
% pr(DKK2 - On | Sample - Normal)
% # of On's in Normal
a = length(onINn);
% total # of samples in Normal
A = length(onINn) + length(offINn);

% pr(DKK2 - On | Sample - Tumor)
% # of On's in Normal
b = length(onINt);
% total # of samples in Tumor
B = length(onINt) + length(offINt);
```

After the values in T has been established, a constant 1 is added as pseudo count to convert the distribution to a probability distribution via Dirichlet process. Finally, the frequencies in T are normalized in order to obtain the final conditional

**Conditional probability table for node  
DKK2 with parent Sample (model = p1)**

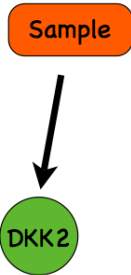

| Sample | Pr(DKK2=Off)          | Pr(DKK2=On)       |
|--------|-----------------------|-------------------|
| Normal | $(A - a + 1)/(A + 2)$ | $(a + 1)/(A + 2)$ |
| Tumor  | $(B - b + 1)/(B + 2)$ | $(b + 1)/(B + 2)$ |

**Fig. 8** Conditional probability table for node *DKK2* in  $\mathcal{M}_{PBK+EI}$  and  $\mathcal{M}_{PBK}$ .

probability values for *DKK2*. Estimation of cpts for genes *DKK3 - 1*, *DKK3 - 2*, *SFRP3* and *LEF1* which have *Sample* as parent require same computations as above.

```
% Conditional probability table for
% DKK2 given its parents
T = [A-a, a; ...
     B-b, b];
[r, c] = size(T);

% Convert the table to probability
% distribution via Dirichlet process
T = T + 1;
for i = 1:r
    T(i, :) = T(i, :)/sum(T(i, :));
end
```

(**model='t2'**) When epigenetic factors are removed from  $\mathcal{M}_{PBK+EI}$  and the model transformed into  $\mathcal{M}_{PBK}$  i.e. model='t2', then the estimation of cpt values for *DKK2* remain the same as in model='t1'. Same computations apply for genes *DKK3 - 1*, *DKK3 - 2*, *SFRP2*, *SFRP3*, *SFRP4*, *SFRP5*, *LEF1*, *DACT1*, *DACT2* and *DACT3*, in model='t2'.

Figure 6 shows the pictorial representation of one of the cpt in  $\mathcal{M}_{PBK+EI}$  and  $\mathcal{M}_{PBK}$ .

**2.6.3 DACT3: (model='t1')** The conditional probability value for a gene being active or inactive is estimated from generated frequency estimates that can help derive probability values. These frequencies depict the following cases (a) gene repressed in normal (represented by vector *offINn*) (b) gene expressed in normal (represented by vector *onINn*) (c) gene repressed in tumorous (represented by vector *offINt*) and (d) gene expressed in tumorous (represented by vector *onINt*), cases. For every  $j^{th}$  entry in the *vecTraining*, if the label(*labelTraining(j)*) is normal ( $\leq 0$ ) and the *DACT3* gene expression (*vecTraining(j)*) is

less than the estimated median ( $\leq \text{vecmedian}$ ) then value in *vecTraining(j)* is appended to *offINn*. Here, expression level lower than median indicates probable gene repression in normal case. If the label (*labelTraining(j)*) is normal ( $\leq 0$ ) and the *DACT3* gene expression (*vecTraining(j)*) is greater than the estimated median ( $\geq \text{vecmedian}$ ) then value in *vecTraining(j)* is appended to *onINn*. Here, expression level greater than median indicates probable gene activation in normal case. If the label (*labelTraining(j)*) is tumorous ( $\geq 0$ ) and the *DACT3* gene expression (*vecTraining(j)*) is less than the estimated median ( $\leq \text{vecmedian}$ ) then value in *vecTraining(j)* is appended to *offINt*. Here, expression level lower than median indicates probable gene repression in tumorous case. And finally, If the label (*labelTraining(j)*) is tumorous ( $\geq 0$ ) and the *DACT3* gene expression (*vecTraining(j)*) is greater than the estimated median ( $\geq \text{vecmedian}$ ) then value in *vecTraining(j)* is appended to *onINt*. Here, expression level greater than median indicates probable gene activation in tumorous case.

```
% Segregate values based on status
% of histone repressive and active
% marks
onINn = [];
offINn = [];
onINt = [];
offINt = [];

for j = 1:lencond
    if labelTraining(j) < 0 &&...
        vecTraining(j) < vecmedian
        offINn = [offINn, vecTraining(j)];
    elseif labelTraining(j) < 0 &&...
        vecTraining(j) >= vecmedian
        onINn = [onINn, vecTraining(j)];
```

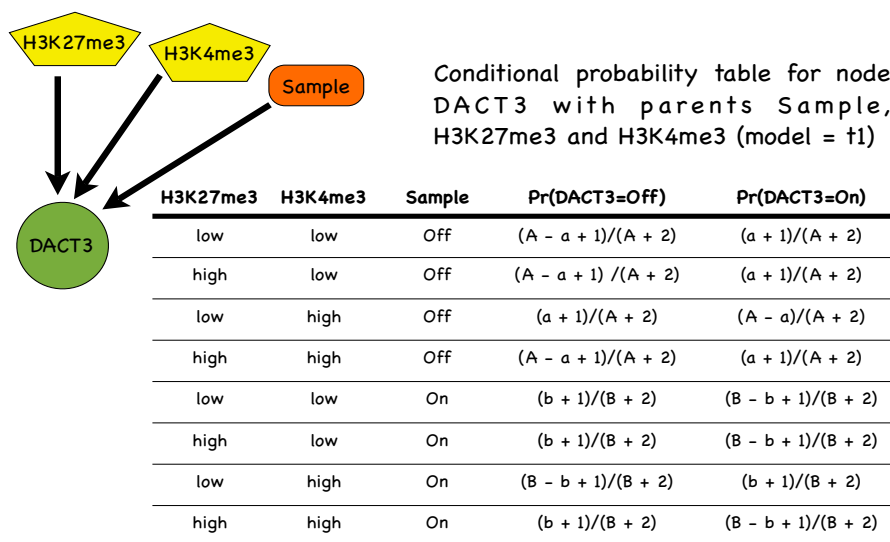

**Fig. 9** Conditional probability table for node *DACT3* in  $\mathcal{M}_{PBK+EI}$ .

```

elseif labelTraining(j) > 0 &&...
    vecTraining(j) < vecmedian
    onINT = [onINT, vecTraining(j)];
else
    offINT = [offINT, vecTraining(j)];
end
end
end

```

Before estimating the values for cpt of *DACT3*, it is important to see how (1) the probability table would look like and (2) the probability table is stored in BNT (Murphy *et al.*<sup>15</sup>). Table 12 represents the conditions of *Sample*, *H3K4me3* and *H3K27me3* the probable beliefs of events (*DACT3* being on/off). Finally, from biological data presented in Jiang *et al.*<sup>3</sup> the conditional probability values for the *DACT3* gene being active based on the histone modification and the available samples suggest that *DACT3* expression is high in normal samples when the histone repressive mark *H3K27me3* is reduced and activating mark *H3K4me3* are present in high abundance. Thus, the probability i.e.  $\Pr(DACT3 = active | H3K27me3 = low, H3K4me3 = high, Sample = normal)$  is the fraction of the number of 1's in the normal samples (*a*) and the total number of normal samples (*A*). For all other conditions of *H3K27me3* and *H3K4me3* when the *Sample* is normal the probability of *DACT3* being active is  $(A - a)$ , i.e. flip or complementray of  $\Pr(DACT3 = active | H3K27me3 = low, H3K4me3 = high, Sample = normal)$ . This is because in all other conditions of the histone marks the probability of *DACT3* being active will be reverse of what it is when *H3K27me3* is reduced and

| CPT for <i>DACT3</i> in $\mathcal{M}_{PBK+EI}$ (model-t1) |                |               |                        |                       |
|-----------------------------------------------------------|----------------|---------------|------------------------|-----------------------|
| <i>H3K27me3</i>                                           | <i>H3K4me3</i> | <i>Sample</i> | Pr( <i>DACT3</i> =Off) | Pr( <i>DACT3</i> =On) |
| 1                                                         | 1              | Normal        | h (1)                  | l (9)                 |
| 2                                                         | 1              | Normal        | h (2)                  | l (10)                |
| 1                                                         | 2              | Normal        | l (3)                  | h (11)                |
| 2                                                         | 2              | Normal        | h (4)                  | l (12)                |
| 1                                                         | 1              | Tumor         | h (5)                  | l (13)                |
| 2                                                         | 1              | Tumor         | h (6)                  | l (14)                |
| 1                                                         | 2              | Tumor         | l (7)                  | h (15)                |
| 2                                                         | 2              | Tumor         | h (8)                  | l (16)                |

**Table 12** Conditional probability table for *DACT3* in  $\mathcal{M}_{PBK}$  (model-t1). h - probability of event being high; l - probability of event being low. 1 - low; 2 - high. Serial numbers in brackets represent the ordering of numbers in vectorial format.

*H3K4me3* is present in abundance. Similarly, in case of tumorous samples, the probability of *DACT3* being active will occur when *H3K27me3* is reduced and *H3K4me3* is high abundance (a rare phenomena). Thus the probability i.e.  $\Pr(DACT3 = active | H3K27me3 = low, H3K4me3 = high, Sample = tumorous)$  is the fraction of the number of 1's in the tumorous sample (*b*) and the total number of tumorous samples (*B*). For all other conditions of *H3K27me3* and *H3K4me3* when the *Sample* is tumorous the probability of *DACT3* being active is  $(B - b)$ , i.e. flip or complementray of  $\Pr(DACT3 = active | H3K27me3 = low, H3K4me3 = high, Sample = tumorous)$ . The reason for flip is the same as described above.

% Generate frequencies for

```
% conditional probability values
% pr(DACT3 - On | H3K27me3 - 1,
% H3K4me3 - 2, Sample - Normal)
% # of On's in Normal
a = length(onINn);
% total # of On's in Normal
A = length(offINn) + length(onINn);

% pr(DACT3 - On | H3K27me3 - 1,
% H3K4me3 - 2, Sample - Tumor)
% # of On's in Tumor
b = length(onINt);
% total # of On's in Tumor
B = length(offINt) + length(onINt);

% In rest of the cases where
% (H3K27me3 - 1 and H3K4me3 - 2) is not
% present, the probabilities reverse.
```

After the values in  $T$  has been established, a constant 1 is added as pseudo count to convert the distribution to a probability distribution via Dirichlet process. Finally, the frequencies in  $T$  are normalized in order to obtain the final conditional probability values for *DACT3*. Figure 9 shows the pictorial representation of one of the cpt in  $\mathcal{M}_{PBK+EI}$ .

```
% Conditional probability table
% for DACT3 given its parents
T = [a, A-a;...
a, A-a;...
A-a, a;...
a, A-a;...
b, B-b;...
b, B-b;...
B-b, b;...
b, B-b];
[r,c] = size(T);

% Convert the table to probability
% distribution via Dirichlet process
T = T + 1;
for i = 1:r
    T(i,:) = T(i,)./sum(T(i,:));
end
```

Finally, for every gene, after the computation of the probability values in their respective cpt, the function `generateGenecpd` returns the following arguments as output.

```
gene_cpd = struct();
gene_cpd.vecmedian = vecmedian;
gene_cpd.T = T;
```

### 3 A programming project for practice

To get a feel of the project, interested readers might want to implement the following steps when the evidence `evidence` is 'me'. The code needs to be embedded as a case in the `switch` part of the `twoHoldOutExp` function. The idea is to perturb the methylation nodes with binary values and find if one can converge to the correct prediction of state of *TRCMPLX* as well as the *Sample*. These binary values are stored in a vector and represents a permutation of the methylation states of the methylation node in  $\mathcal{M}_{PBK+EI}$ . Varying the values of the vector can help study how perturbations affect the prediction of the network and the predictions. The steps are given below

-

1. Define variables for storing predictions of *TRCMPLX* (`tempTRCMPLX`) and *Sample* (`tempSample`).
2. Find the total number of methylation cases in  $\mathcal{M}_{PBK+EI}$  and store the number in a variable `noMethylation`.
3. Generate binary values for `noMethylation` nodes. Define a cell (`binaryStatesOfMethylation`) that can store vectors of binary values where every permutation represents a set of methylation states. The total number of permutations should be  $2^{noMethylation}$  which is stored in `noMethylationConfig`. One might want to use `quantizer` and `num2bin` functions from matlab.
4. Next, generate methylation evidences. Define a 2D matrix variable `methylationEvidence` that stores the methylation evidences. One might want to use the matlab function `str2num`. Finally, add a value of 1 to `methylationEvidence` as the BNT takes in '1' and '2' as states representing binary values.
5. Build evidence for inference for every test example. The steps following might be necessary
  - For every methylation configuration and for every methylation node build evidence.
  - Build a new bayesian network in `bnetEngine` using `jtree_inf_engine` and store the modified engine (in `engine`) using the function `enter_evidence`.
  - Finally, compute the  $\Pr(TRCMPLX = 2|ge$  as evidence) and  $\Pr(Sample = 2|ge$  as evidence) using the function `marginal_nodes`.
6. Store predicted results on observed methylation in structure `Runs` indexed with `runCnt`.

After the section of new code is filled in, run the code and check the results.



## 4 Conclusion

A pedagogical walkthrough of a computational modeling and simulation project is presented using parts of programming code interleaved with theory. The purpose behind this endeavour is to acclimatize and ease the understanding of beginner students and researchers in transition, who intend to work on computational signaling biology projects. To this end, static Bayesian network models for the Wnt signaling pathway has been selected for elucidation. This is done due to lack or paucity of manuscripts explaining the computational experiments from tutorial perspective due to restrictive policies.

## Acknowledgement

Thanks to - (1) All anonymous reviewers who have helped in refining this manuscript. (2) Netherlands Bioinformatics Centre (NBIC) for funding the project. (3) Dr. ir. R. H. J. Faste-nau (Dean of Faculty of Electrical Engineering Mathematics and Computer Science), Dr. Prof. Ir. K. Ch. A. M. Luyben (Rector Magnificus) and Drs. D. J. van den Berg (President) at Delft University of Technology, for providing support for conducting this work and giving permission to submit the manuscript. (4) Dr. Wim Verhaegh (faculty at Netherlands Bioinformatics Centre and a principal scientist at Molecular Diagnostic Lab in Philips Research) for providing technical details of Naive Bayes model for replicating experiments in Verhaegh *et al.*<sup>2</sup>. (5) Dr. Marcel J. T. Reinders (scientific director of Bioinformatics Research at Netherlands Bioinformatics Centre and a professor at Delft University of Technology) for refining the proposed model and suggesting inclusion of methylation data. (6) Dr. Robert P.W. Duin (retired associate professor at Delft University of Technology) for informal discussions on 2-foldout experiments and (7) Dr. Jeroen de Ridder (assistant professor at Delft University of Technology) and (8) Phd candidate Marc Hulsman (Delft University of Technology), for informal discussions on estimation of probability values on methylation data. (9) The author is indebted to Mr. Prabhat Sinha and Mrs. Rita Sinha for financially supporting this project while the author was on educational and work leave.

## Conflict of Interest

None.

## References

1 S. Sinha, *Integr. Biol.*, 2014, **6**, 1034–1048.

- 2 W. Verhaegh, P. Hatzis, H. Clevers and A. van de Stolpe, *Cancer Research, San Antonio Breast Cancer Symposium*, 2011, **71**, 524–525.
- 3 X. Jiang, J. Tan, J. Li, S. Kivimäe, X. Yang, L. Zhuang, P. Lee, M. Chan, L. Stanton, E. Liu, B. Cheyette and Q. Yu, *Cancer cell*, 2008, **13**, 529–541.
- 4 H. Clevers, *Cell*, 2006, **127**, 469–480.
- 5 A. Gregorieff and H. Clevers, *Genes & development*, 2005, **19**, 877–890.
- 6 J. Costello and C. Plass, *Journal of medical genetics*, 2001, **38**, 285–303.
- 7 P. Das and R. Singal, *Journal of Clinical Oncology*, 2004, **22**, 4632–4642.
- 8 J. Issa, *Clinical Cancer Research*, 2007, **13**, 1634–1637.
- 9 H. Suzuki, D. Watkins, K. Jair, K. Schuebel, S. Markowitz, W. Chen, T. Pretlow, B. Yang, Y. Akiyama, M. Van Engeland *et al.*, *Nature genetics*, 2004, **36**, 417–422.
- 10 C. Niehrs, *Oncogene*, 2006, **25**, 7469–7481.
- 11 H. Sato, H. Suzuki, M. Toyota, M. Nojima, R. Maruyama, S. Sasaki, H. Takagi, Y. Sogabe, Y. Sasaki, M. Idogawa, T. Sonoda, M. Mori, K. Imai, T. Tokino and Y. Shinomura, *Carcinogenesis*, 2007, **28**, 2459–2466.
- 12 H. Taniguchi, H. Yamamoto, T. Hirata, N. Miyamoto, M. Oki, K. Noshio, Y. Adachi, T. Endo, K. Imai and Y. Shinomura, *Oncogene*, 2005, **24**, 7946–7952.
- 13 B. Strahl and C. Allis, *Nature*, 2000, **403**, 41–45.
- 14 C. Peterson, M. Laniel *et al.*, *Current Biology*, 2004, **14**, 546–551.
- 15 K. Murphy *et al.*, *Computing science and statistics*, 2001, **33**, 1024–1034.
- 16 O. Aguilera, M. Fraga, E. Ballestar, M. Paz, M. Herranz, J. Espada, J. Garcia, A. Munoz, M. Esteller and J. Gonzalez-Sancho, *Oncogene*, 2006, **25**, 4116–4121.
- 17 H. Suzuki, E. Gabrielson, W. Chen, R. Anbazhagan, M. Van Engeland, M. Weijnenberg, J. Herman and S. Baylin, *Nature genetics*, 2002, **31**, 141–149.
- 18 G. Yuan, C. Wang, C. Ma, N. Chen, Q. Tian, T. Zhang and W. Fu, *PLoS one*, 2012, **7**, e34004.
- 19 L. Kriegel, D. Horst, J. Reiche, J. Engel, T. Kirchner, A. Jung *et al.*, *J. Transl. Med.*, 2010, **8**, 123.
- 20 M. Waterman, *Cancer and Metastasis Reviews*, 2004, **23**, 41–52.
- 21 G. Yochum, *PLoS one*, 2011, **6**, e18966.
- 22 K. Schmidt-Ott, T. Masckauchan, X. Chen, B. Hirsh, A. Sarkar, J. Yang, N. Paragas, V. Wallace, D. Dufort, P. Pavlidis *et al.*, *Development*, 2007, **134**, 3177–3190.
- 23 S. Kanwar, Y. Yu, J. Nautiyal, B. Patel and A. Majumdar, *Molecular cancer*, 2010, **9**, 212.
- 24 G. Caldwell, C. Jones, P. Taniere, R. Warrack, Y. Soon, G. Matthews and D. Morton, *British journal of cancer*, 2006, **94**, 922–927.
- 25 N. Reguart, B. He, Z. Xu, L. You, A. Lee, J. Mazieres, I. Mikami, S. Batra, R. Rosell, F. McCormick *et al.*, *Biochemical and biophysical research communications*, 2004, **323**, 229–234.
- 26 J. González-Sancho, O. Aguilera, J. García, N. Pendás-Franco, C. Peña, S. Cal, A. de Herreiros, F. Bonilla and A. Muñoz, *Oncogene*, 2004, **24**, 1098–1103.
- 27 N. Pendas-Franco, J. Garcia, C. Pena, N. Valle, H. Palmer, M. Heinäniemi, C. Carlberg, B. Jimenez, F. Bonilla, A. Munoz *et al.*, *Oncogene*, 2008, **27**, 4467–4477.
- 28 S. Baehs, A. Herbst, S. Thieme, C. Perschl, A. Behrens, S. Scheel, A. Jung, T. Brabletz, B. Göke, H. Blum *et al.*, *Cancer letters*, 2009, **276**, 152–159.
- 29 A. Matsui, T. Yamaguchi, S. Maekawa, C. Miyazaki, S. Takano, T. Uetake, T. Inoue, M. Otaka, H. Otsuka, T. Sato *et al.*, *Cancer science*, 2009, **100**, 1923–1930.
- 30 M. Zitt, G. Untergasser, A. Amberger, P. Moser, S. Stadlmann, M. Zitt, H. Müller, G. Mühlmann, A. Perathoner, R. Margreiter *et al.*, *Disease Markers*, 2008, **24**, 101–109.
- 31 J. Veeck and E. Dahl, *Biochimica et Biophysica Acta (BBA)-Reviews on Cancer*, 2012, 18–28.
- 32 P. Brophy, K. Lang and G. Dressler, *Journal of Biological Chemistry*, 2003, **278**, 52401–52405.
- 33 Q. Feng Han, W. Zhao, J. Bentel, A. Shearwood, N. Zeps, D. Joseph, B. Iacopetta and A. Dharmarajan, *Cancer letters*, 2006, **231**, 129–137.
- 34 D. Huang, B. Yu, Y. Deng, W. Sheng, Z. Peng, W. Qin and X. Du, *Journal of cancer research and clinical oncology*, 2010, **136**, 395–401.
- 35 B. Hoang, M. Moos, S. Vukicevic and F. Luyten, *Journal of Biological Chemistry*, 1996, **271**, 26131–26137.
- 36 S. Kivimäe, X. Yang and B. Cheyette, *BMC biochemistry*, 2011, **12**, 33.
- 37 E. Charniak, *AI magazine*, 1991, **12**, 50.
